# Supplementary material for: Development of a core SNP arrays based on the KASP method for molecular breeding of rice
Source: Rice (N Y). 2019 Apr 8;12:21. doi: 10.1186/s12284-019-0272-3 (PMC6453994; doi:10.1186/s12284-019-0272-3)
Supplement: Supplementary file 2 — Table S2. List of the rice germplasm used in this study. (XLSX 39 kb) [file 12284_2019_272_MOESM2_ESM.xlsx]

## Sheet: Sheet1
Table S2 List of the rice germplasm used in this study
Panel ID	Description	Name in English	Name in Chinese	Origin	IRGC
KBen-001	Pure line	Feng Xian Zhan	丰籼占	China	NA
KBen-002	Pure line	Gui Jing Si Miao	桂晶丝苗	China	NA
KBen-003	Pure line	Huang Li Si Miao	黄莉丝苗	China	NA
KBen-004	Pure line	Huang Ruan Xiu Zhan	黄软秀占	China	NA
KBen-005	Pure line	Huang Xiu Si Miao	黄秀丝苗	China	NA
KBen-006	Pure line	Nan Yue Zhan	南粤占	China	NA
KBen-007	Pure line	Wu Shan Feng Zhan	五山丰占	China	NA
KBen-008	Pure line	Wu Shan Li Zhan	五山莉占	China	NA
KBen-009	Pure line	Yue He Si Miao	粤禾丝苗	China	NA
KBen-010	Pure line	Wu Shan Mei Zhan	五山美占	China	NA
KBen-011	Pure line	Hua Kuan Zhan	华宽占	China	NA
KBen-012	Pure line	Gu Feng Zhan	固丰占	China	NA
KBen-013	Pure line	Yue Jin You Zhan	粤金油占	China	NA
KBen-014	Pure line	Jin Feng Ruan Zhan	金丰软占	China	NA
KBen-015	Pure line	Nan Jing Zhan	南晶占	China	NA
KBen-016	Pure line	Peng Dao 2Hao	鹏稻2号	China	NA
KBen-017	Pure line	Yue Shan Zhan 7Hao	粤山占7号	China	NA
KBen-018	Pure line	R900	R900	China	NA
KBen-019	Pure line	Jin Hang You Zhan	金航油占	China	NA
KBen-020	Pure line	Hua Hang 37Hao	华航37号	China	NA
KBen-021	Pure line	Hua Hang Xin Xuan 10-2	华航新选10-2	China	NA
KBen-022	Pure line	Xiangwanxian 13	湘晚籼13号	China	NA
KBen-023	Pure line	Xiangwanxian 17	湘晚籼17号	China	NA
KBen-024	Pure line	Xiang Ya Xiang Zhan	象牙香占	China	NA
KBen-025	Pure line	Liu Feng 003	柳丰003	China	NA
KBen-026	Pure line	R9802	R9802	China	NA
KBen-027	Pure line	Jin Hua Zhan 3Hao	金华占3号	China	NA
KBen-028	Pure line	Jin Hua Zhan 2Hao	金华占2号	China	NA
KBen-029	Pure line	Ai Jiao Nan Te	矮脚南特	China	NA
KBen-030	Pure line	Hui Yang Zhen Zhu Zao	惠阳珍珠早	China	NA
KBen-031	Pure line	Nipponbare	日本晴	China	NA
KBen-032	Pure line	Ming Hui 63	明恢63	China	NA
KBen-033	Pure line	Francis	Francis	China	NA
KBen-034	Pure line	R998-1	R998-1	China	NA
KBen-035	Pure line	Yang Jiang Kang Bing Pin Xi	阳江抗病品系	China	NA
KBen-036	Pure line	Luhui H103	泸恢H103	China	NA
KBen-037	Pure line	Luhui H8528	泸恢8528	China	NA
KBen-038	Pure line	Jiu Qi Xiang	九七香	China	NA
KBen-039	Pure line	Yu Zhen Xiang	玉针香	China	NA
KBen-040	Pure line	Kang Cao Dao 1Hao	抗草稻1号	China	NA
KBen-041	Pure line	Long Jing 21	龙粳21	China	NA
KBen-042	Pure line	Wu Shan Si Miao	五山丝苗	China	NA
KBen-043	Pure line	Ba Si Ma Di 370	巴斯马蒂370	China	NA
KBen-044	Pure line	Yun Jing 22	云粳22	China	NA
KBen-045	Pure line	Yue Feng Xin Zhan	粤丰新占	China	NA
KBen-046	Pure line	Hang Xiang -1	航香-1	China	NA
KBen-047	Pure line	Sheng Ba Si Miao	胜巴丝苗	China	NA
KBen-048	Pure line	Jin Hang Ruan Zhan	金航软占	China	NA
KBen-049	Pure line	Hang Xiang 47Hao	航香47号	China	NA
KBen-050	Pure line	Hang Xiang 48Hao	航香48号	China	NA
KBen-051	Pure line	Jin Hang Ruan Zhan -1	金航软占-1	China	NA
KBen-052	Pure line	Hua Hang You Zhan	华航油占	China	NA
KBen-053	Pure line	Jin Xiang Si Miao	金香丝苗	China	NA
KBen-054	Pure line	Hua Hang 31Hao	华航31号	China	NA
KBen-055	Pure line	Yue You Si Miao	粤油丝苗	China	NA
KBen-056	Pure line	Feng Xiu Si Miao	丰秀丝苗	China	NA
KBen-057	Pure line	Gui Nong Zhan	桂农占	China	NA
KBen-058	Pure line	Xin Huang Zhan	新黄占	China	NA
KBen-059	Pure line	San Ao Zhan	三澳占	China	NA
KBen-060	Pure line	Wu Guang Zhan	五广占	China	NA
KBen-061	Pure line	Xian Li Zhan	籼莉占	China	NA
KBen-062	Pure line	Zao Jing Zhan	早粳占	China	NA
KBen-063	Pure line	Wu Shan Huang Zhan	五山黄占	China	NA
KBen-064	Pure line	Yue Tai Zao Zhan	粤泰早占	China	NA
KBen-065	Pure line	Yue Feng Si Zhan	粤丰丝占	China	NA
KBen-066	Pure line	Tai Nong Xin Zhan	台农新占	China	NA
KBen-067	Pure line	Yu Jing Zhan 2Hao	玉晶占2号	China	NA
KBen-068	Pure line	Wu Shan Hua Dao	五山化稻	China	NA
KBen-069	Pure line	Tai Feng B	泰丰B	China	NA
KBen-070	Pure line	R8166	R8166	China	NA
KBen-071	Pure line	Yue Nong Si Miao	粤农丝苗	China	NA
KBen-072	Pure line	Yue He Si Miao	粤合丝苗	China	NA
KBen-073	Pure line	Yue Huang Si Miao	粤黄丝苗	China	NA
KBen-074	Pure line	Yue Xiu Si Miao	粤秀丝苗	China	NA
KBen-075	Pure line	Cheng Hui 210	成恢210	China	NA
KBen-076	Pure line	R1171	R1171	China	NA
KBen-077	Pure line	R1173	R1173	China	NA
KBen-078	Pure line	R1179	R1179	China	NA
KBen-079	Pure line	R1198	R1198	China	NA
KBen-080	Pure line	Hua Xiang 4016	花香4016	China	NA
KBen-081	Pure line	Hua Xiang You 1618	花香优1618	China	NA
KBen-082	Pure line	Hua Zhan	华占	China	NA
KBen-083	Pure line	Qiu B	秋B	China	NA
KBen-084	Pure line	R819	R819	China	NA
KBen-085	Pure line	Yue Mei Si Miao	粤美丝苗	China	NA
KBen-086	Pure line	Huang Yue Si Miao	黄粤丝苗	China	NA
KBen-087	Pure line	Bai Huang Zhan	白黄占	China	NA
KBen-088	Pure line	Gu Guang Zhan	固广占	China	NA
KBen-089	Pure line	Yue Yu Si Miao	粤玉丝苗	China	NA
KBen-090	Pure line	Jin Sheng Ruan Zhan	金胜软占	China	NA
KBen-091	Pure line	Jin Long Si Miao	金龙丝苗	China	NA
KBen-092	Pure line	Wushan Moli	五山茉莉	China	NA
KBen-093	Pure line	Yu Xiang You Zhan Xuan	玉香油占选	China	NA
KBen-094	Pure line	Huang Chao Zhan Xuan	黄超占选	China	NA
KBen-095	Pure line	Yue Feng Xin Zhan Xuan	粤丰新占选	China	NA
KBen-096	Pure line	Wu Shan Gui Zhan	五山桂占	China	NA
KBen-097	Pure line	Hua Yue Si Miao	华粤丝苗	China	NA
KBen-098	Pure line	Jin Mei Si Miao	金美丝苗	China	NA
KBen-099	Pure line	Zhu Bao Mei 4Hao	竹包美4号	China	NA
KBen-100	Pure line	Huang Feng Si Miao	黄丰丝苗	China	NA
KBen-101	Pure line	Mei Te Zhan	美特占	China	NA
KBen-102	Pure line	Yue Qi Xin Zhan	粤齐新占	China	NA
KBen-103	Pure line	Mei Hua Zhan	美华占	China	NA
KBen-104	Pure line	Yue Li Zhan	粤莉占	China	NA
KBen-105	Pure line	Feng Yue Hua Zhan	丰粤华占	China	NA
KBen-106	Pure line	Hua Zhong Zhan 2Hao	华中占2号	China	NA
KBen-107	Pure line	Hua Mei Si Miao	华美丝苗	China	NA
KBen-108	Pure line	He Feng Zhan	合丰占	China	NA
KBen-109	Pure line	Xue Hua Xin Zhan	雪华新占	China	NA
KBen-110	Pure line	He Feng Si Miao	合丰丝苗	China	NA
KBen-111	Pure line	Huang Xiu Zhan	黄秀占	China	NA
KBen-112	Pure line	Qi Fo Zhan	七佛占	China	NA
KBen-113	Pure line	Xin Feng Zhan	新丰占	China	NA
KBen-114	Pure line	Molizhan	茉莉占	China	NA
KBen-115	Pure line	Chuan Hui 907	川恢907	China	NA
KBen-116	Pure line	Chuan Hui 4016	川恢4016	China	NA
KBen-117	Pure line	Cheng Hui 727	成恢727	China	NA
KBen-118	Pure line	R1517	R1517	China	NA
KBen-119	Pure line	Hua Hang 36Hao	华航36号	China	NA
KBen-120	Pure line	Huang Yin Zhan	黄银占	China	NA
KBen-121	Pure line	Yue Jing Nong Zhan	粤晶农占	China	NA
KBen-122	Pure line	9311	9311	China	NA
KBen-123	Pure line	R9113	R9113	China	NA
KBen-124	Pure line	Xing Ning Hei Nuo	兴宁黑糯	China	NA
KBen-125	Pure line	Za Zi Mi	杂紫米	China	NA
KBen-126	Pure line	Hei Nuo	黑糯	China	NA
KBen-127	Pure line	Hei Xiang Ruan Mi	黑香软米	China	NA
KBen-128	Pure line	Xiang Hei Nuo	香黑糯	China	NA
KBen-129	Pure line	Hei Zhan Gu	黑粘谷	China	NA
KBen-130	Pure line	Qing Yuan Hei Gu	清远黑谷	China	NA
KBen-131	Pure line	Yun Nan Hei Mi	云南黑米	China	NA
KBen-132	Pure line	Yun Nan Hong Gu	云南红谷	China	NA
KBen-133	Pure line	Da Li Hong Nuo	大粒红糯	China	NA
KBen-134	Pure line	Yun Nan Hn	云南hn	China	NA
KBen-135	Pure line	Hong Si Miao	红丝苗	China	NA
KBen-136	Pure line	Hong Li Si Miao	红荔丝苗	China	NA
KBen-137	Pure line	Guang Hong 2Hao Xuan	广红2号选	China	NA
KBen-138	Pure line	Hang Hong Si Miao	航红丝苗	China	NA
KBen-139	Pure line	Xiang Hong Bao	香红宝	China	NA
KBen-140	Pure line	Liu Feng Bai Nuo	柳丰白糯	China	NA
KBen-141	Pure line	Jing Xiang Nuo	荆香糯	China	NA
KBen-142	Pure line	Yong Kang Nuo	永康糯	China	NA
KBen-143	Pure line	Wan Li Nuo	万里糯	China	NA
KBen-144	Pure line	De Yang Jing Nuo	德阳粳糯	China	NA
KBen-145	Pure line	Hang Xiang Nuo	航香糯	China	NA
KBen-146	Pure line	Xiannuo	籼糯	China	NA
KBen-147	Pure line	Yue Xiang Nuo	粤香糯	China	NA
KBen-148	Pure line	Hua Jing Xian 74	华粳籼74	China	NA
KBen-149	Pure line	Nei 10You 7206	内10优7206	China	NA
KBen-150	Pure line	Xin Yin Chang Li Zhong	新引长粒种	China	NA
KBen-151	Pure line	Yi You 673	宜优673	China	NA
KBen-152	Pure line	R3550	R3550	China	NA
KBen-153	Pure line	R832	R832	China	NA
KBen-154	Pure line	Hang Hui 213	航恢213	China	NA
KBen-155	Pure line	Hang Hui 173	航恢173	China	NA
KBen-156	Pure line	Hang Hui 191	航恢191	China	NA
KBen-157	Pure line	Shen Yang Yin	沈阳引进	China	NA
KBen-158	Pure line	Shen Yang Yin	沈阳引进	China	NA
KBen-159	Pure line	Shen Nong 9816	沈农9816	China	NA
KBen-160	Pure line	Shen Nong 1402-1	沈农1402-1	China	NA
KBen-161	Pure line	Shen Nong 016-1	沈农016-1	China	NA
KBen-162	Pure line	Shen Nong Yin Zhong	沈农引种	China	NA
KBen-163	Pure line	Hong Wan 籼924	洪晚籼924	China	NA
KBen-164	Pure line	Wu Yun Jing 23	武运粳23	China	NA
KBen-165	Pure line	Nan Jing 46	南粳46	China	NA
KBen-166	Pure line	You 8Hao	甬优8号	China	NA
KBen-167	Pure line	W Da Sui	W大穗	China	NA
KBen-168	Pure line	W030	W030	China	NA
KBen-169	Pure line	Qing Yuan Nuo Mi	清远糯米	China	NA
KBen-170	Pure line	Xing Ning Hei Zhan	兴宁黑粘	China	NA
KBen-171	Pure line	Guang Yuan Zhan 12Hao	广源占12号	China	NA
KBen-172	Pure line	Huang Guang Si Miao	黄广丝苗	China	NA
KBen-173	Pure line	Huang Guang Si You Zhan	黄广丝油占	China	NA
KBen-174	Pure line	Huang Guang Hua Zhan 1Hao	黄广华占1号	China	NA
KBen-175	Pure line	Huang Guang Hua Zhan 1Hao	黄广华占1号	China	NA
KBen-176	Pure line	Xiang Yi Nong 1Hao	乡意浓1号	China	NA
KBen-177	Pure line	Da Feng Nuo	大丰糯	China	NA
KBen-178	Pure line	Cheng Zhan	禅城占	China	NA
KBen-179	Pure line	Feng Zao Si Miao	凤枣丝苗	China	NA
KBen-180	Pure line	Feng Lu Si Miao	丰路丝苗	China	NA
KBen-181	Pure line	Yue Mei Zhan	粤美占	China	NA
KBen-182	Pure line	Huang Jing Zhan	黄晶占	China	NA
KBen-183	Pure line	Nan Yue Zhan	南粤占	China	NA
KBen-184	Pure line	Peng Dao 2Hao	鹏稻2号	China	NA
KBen-185	Pure line	He Li Si Miao	合莉丝苗	China	NA
KBen-186	Pure line	Yue Biao 5Hao	粤标5号	China	NA
KBen-187	Pure line	Yue Biao 5Hao -2	粤标5号-2	China	NA
KBen-188	Pure line	Guang Yuan Zhan 15Hao	广源占15号	China	NA
KBen-189	Pure line	Mei Xiang Zhan 2Hao	美香占2号	China	NA
KBen-190	Pure line	Yue Huang Guang Zhan	粤黄广占	China	NA
KBen-191	Pure line	Fan 19	繁19	China	NA
KBen-192	Pure line	Xin 1421	新1421	China	NA
KBen-193	Pure line	Xin 1423	新1423	China	NA
KBen-194	Pure line	Guang Chao 1421	广超1421	China	NA
KBen-195	Pure line	Guang Chao 1423	广超1423	China	NA
KBen-196	Pure line	Yue Hong Bao	粤红宝	China	NA
KBen-197	Pure line	Hua 32	华32	China	NA
KBen-198	Pure line	Hua 37	华37	China	NA
KBen-199	Pure line	Jiang Nong 1	江农1	China	NA
KBen-200	Pure line	Heng Feng B	恒丰B	China	NA
KBen-201	Pure line	Fo Shan Chang Li	佛山长粒	China	NA
KBen-202	Pure line	R1199	R1199	China	NA
KBen-203	Pure line	Yu 3Hao	皓豫3号	China	NA
KBen-204	Pure line	Kai Ping Xiao You Li	开平小优粒	China	NA
KBen-205	Pure line	Ruan Zhan	软占	China	NA
KBen-206	Pure line	Xian You Zhan	先油占	China	NA
KBen-207	Pure line	Huang Guang You Zhan -1	黄广油占-1	China	NA
KBen-208	Pure line	Huang Guang Hua Zhan 2Hao	黄广华占2号	China	NA
KBen-209	Pure line	Huang Guang Xin Zhan	黄广新占	China	NA
KBen-210	Pure line	Huang Guang Ruan Zhan	黄广软占	China	NA
KBen-211	Pure line	Huang Jin Si Miao	黄金丝苗	China	NA
KBen-212	Pure line	Yue Xin Yin Zhan	粤新银占	China	NA
KBen-213	Pure line	Yue Xin You Zhan -1	粤新油占-1	China	NA
KBen-214	Pure line	Yue Tai You Zhan	粤泰油占	China	NA
KBen-215	Pure line	Yue Hang You Zhan	粤航油占	China	NA
KBen-216	Pure line	Nan Feng Zhan	南丰占	China	NA
KBen-217	Pure line	Nong Jing Si Miao	农晶丝苗	China	NA
KBen-218	Pure line	Lv Yin Zhan	绿银占	China	NA
KBen-219	Pure line	He Li You Zhan	合莉油占	China	NA
KBen-220	Pure line	Gu Jin Zhan	固金占	China	NA
KBen-221	Pure line	Guang Jing Ruan Zhan	广晶软占	China	NA
KBen-222	Pure line	Jin Nong Si Miao	金农丝苗	China	NA
KBen-223	Pure line	Yuan Si Miao -1	禅元丝苗-1	China	NA
KBen-224	Pure line	Wu Yuan Zhan	五源占	China	NA
KBen-225	Pure line	Feng Xin Si Miao -1	凤新丝苗-1	China	NA
KBen-226	Pure line	Ning Qi Ruan Zhan	宁七软占	China	NA
KBen-227	Pure line	Gui Yu 9Hao	桂育9号	China	NA
KBen-228	Pure line	Gui He Feng	桂禾丰	China	NA
KBen-229	Pure line	Chuan You 7286	川优7286	China	NA
KBen-230	Pure line	Nei 6You 7028	内6优7028	China	NA
KBen-231	Pure line	Shen Liang You Hang Xiang	深两优航香	China	NA
KBen-232	Pure line	Wu You 1226	五优1226	China	NA
KBen-233	Pure line	Sang Lan Dao —Nuo	桑兰稻—糯	China	NA
KBen-234	Pure line	Sang Lan Dao —Hong	桑兰稻—红	China	NA
KC001	Male sterile line	Jun Xiang A	钧香A	China	NA
KC002	Male sterile line	Shen 08S	深08S	China	NA
KC003	Male sterile line	He S	和S	China	NA
KC004	Male sterile line	Xiang Ling 628S	湘陵628S	China	NA
KC005	Male sterile line	Long S	泷S	China	NA
KC006	Male sterile line	Ge 68A	葛68A	China	NA
KC007	Male sterile line	Chang Xiang A	长香A	China	NA
KC008	Male sterile line	Tai Feng A	泰丰A	China	NA
KC009	Male sterile line	Rgd7S	RGD7S	China	NA
KC010	Male sterile line	Ruan Hua A	软华A	China	NA
KC011	Male sterile line	Ming 218A	明218A	China	NA
KC012	Male sterile line	152Zr6A	152ZR6A	China	NA
KC013	Male sterile line	Shen 08S	深08S	China	NA
KC014	Male sterile line	Y58S	Y58S	China	NA
KC015	Male sterile line	C815S	C815S	China	NA
KC016	Male sterile line	Chuang 5S	创5S	China	NA
KC017	Male sterile line	638S	638S	China	NA
KC018	Male sterile line	Jing A	竞A	China	NA
KC019	Male sterile line	Lu A	露A	China	NA
KC020	Male sterile line	Wang A	旺A	China	NA
KC021	Male sterile line	Su 7A	苏7A	China	NA
KC022	Male sterile line	Bo 2S	泊2S	China	NA
KC023	Male sterile line	Shuang 11S	双11S	China	NA
KC024	Male sterile line	Gf01A	GF01A	China	NA
KC025	Male sterile line	Gf02A	GF02A	China	NA
KC026	Male sterile line	33S	33S	China	NA
KC027	Male sterile line	Zheng Xiang A	正湘A	China	NA
KC028	Male sterile line	Wu Feng A	五丰A	China	NA
KD001	Pure line	Advanced inbred line	华航油占/ 黄软占	Developed in our laboratory	NA
KD002	Pure line	Advanced inbred line	华航油占/ 黄软占	Developed in our laboratory	NA
KD003	Pure line	Advanced inbred line	华航油占/ 黄软占	Developed in our laboratory	NA
KD004	Pure line	Advanced inbred line	华航油占/ 黄软占	Developed in our laboratory	NA
KD005	Pure line	Advanced inbred line	华航油占/ 黄软占	Developed in our laboratory	NA
KD006	Pure line	Yu Xiang You Zhan	玉香油占	China	NA
KD007	Pure line	Advanced inbred line	华航31号/ 金农丝苗	Developed in our laboratory	NA
KD008	Pure line	Advanced inbred line	华航31号/ 金农丝苗	Developed in our laboratory	NA
KD009	Pure line	Advanced inbred line	华航31号/ 金农丝苗	Developed in our laboratory	NA
KD010	Pure line	Advanced inbred line	华航31号/ 金农丝苗	Developed in our laboratory	NA
KD011	Pure line	Advanced inbred line	华航31号/金农丝苗 // 华航31号/五山丝苗	Developed in our laboratory	NA
KD012	Pure line	Advanced inbred line	华航31号/金农丝苗 // 华航31号/五山丝苗	Developed in our laboratory	NA
KD013	Pure line	Advanced inbred line	华航31号/金农丝苗 // 华航31号/五山丝苗	Developed in our laboratory	NA
KD014	Pure line	Advanced inbred line	华航31号/金农丝苗 // 华航31号/五山丝苗	Developed in our laboratory	NA
KD015	Pure line	Advanced inbred line	华航31号/黄软占 // 华航31号/金农丝苗	Developed in our laboratory	NA
KD016	Pure line	Advanced inbred line	华航31号/黄软占 // 华航31号/金农丝苗	Developed in our laboratory	NA
KD017	Pure line	Advanced inbred line	航恢香占/粤油丝苗 // 华航油占/粤油丝苗	Developed in our laboratory	NA
KD018	Pure line	Advanced inbred line	黄丝占/黄软占//华航31号/金农丝苗	Developed in our laboratory	NA
KD019	Pure line	Advanced inbred line	黄丝占/黄软占//华航31号/金农丝苗	Developed in our laboratory	NA
KD020	Pure line	Advanced inbred line	黄丝占/黄软占//华航31号/金农丝苗	Developed in our laboratory	NA
KD021	Pure line	Advanced inbred line	华航油占/粤油丝苗/五山丝苗/胜巴丝苗	Developed in our laboratory	NA
KD022	Pure line	Advanced inbred line	华航油占/粤油丝苗/五山丝苗/胜巴丝苗	Developed in our laboratory	NA
KD023	Pure line	He Feng Si Miao	合丰丝苗	China	NA
KD024	Pure line	Advanced inbred line	华航31号选-1 / 粤农丝苗	Developed in our laboratory	NA
KD025	Pure line	Advanced inbred line	丰泰早香10 / 金航油占	Developed in our laboratory	NA
KD026	Pure line	Advanced inbred line	CHA-1///胜巴16/CBB23// 胜巴16	Developed in our laboratory	NA
KD027	Pure line	Advanced inbred line	胜巴16/CBB23// 胜巴16///新月糯	Developed in our laboratory	NA
KD028	Pure line	Advanced inbred line	五山油占/胜巴16/CBB23///合丝占////胜巴16/CBB23//胜巴16	Developed in our laboratory	NA
KD029	Pure line	Advanced inbred line	成恢210 / R1173	Developed in our laboratory	NA
KD030	Pure line	Advanced inbred line	华航31号///胜巴16/CBB23//胜巴16	Developed in our laboratory	NA
KD031	Pure line	Advanced inbred line	航恢213 / 华航31号	Developed in our laboratory	NA
KD032	Pure line	Advanced inbred line	R1173 / R1198	Developed in our laboratory	NA
KD033	Pure line	Hua Hang 48 Hao	华航48号	Developed in our laboratory	NA
KD034	Pure line	Hua Hang 38 Hao	华航38号	Developed in our laboratory	NA
KD035	Pure line	Hua Hang 33 Hao	华航33号	Developed in our laboratory	NA
KD036	Pure line	Hua Hang 32 Hao	华航32号	Developed in our laboratory	NA
KD037	Pure line	Advanced inbred line	合丝占 / 茉莉油占	Developed in our laboratory	NA
KD038	Pure line	Advanced inbred line	华航31号选	Developed in our laboratory	NA
KD039	Pure line	Advanced inbred line	华航31号/ 金农丝苗	Developed in our laboratory	NA
KD040	Pure line	Advanced inbred line	华航31号/ 金农丝苗	Developed in our laboratory	NA
KD041	Pure line	Advanced inbred line	华航31号/ 金农丝苗	Developed in our laboratory	NA
KD042	Pure line	Advanced inbred line	华航油占 / 黄广占	Developed in our laboratory	NA
KD043	Pure line	Advanced inbred line	华航油占 / 黄广占	Developed in our laboratory	NA
KD044	Pure line	Advanced inbred line	黄莉占 / 航香48号	Developed in our laboratory	NA
KD045	Pure line	Advanced inbred line	黄莉占 / 航香48号	Developed in our laboratory	NA
KD046	Pure line	Advanced inbred line	五山油占//合丝占 / 茉莉油占	Developed in our laboratory	NA
KD047	Pure line	Advanced inbred line	华航31号/金农丝苗 // 华航31号/五山丝苗	Developed in our laboratory	NA
KD048	Pure line	Advanced inbred line	华航31号/金农丝苗 // 华航31号/五山丝苗	Developed in our laboratory	NA
KD049	Pure line	Advanced inbred line	华航31号/黄软占 // 华航31号/金农丝苗	Developed in our laboratory	NA
KD050	Pure line	Advanced inbred line	华航31号/黄软占 // 华航31号/金农丝苗	Developed in our laboratory	NA
KD051	Pure line	Advanced inbred line	华航31号/黄软占 // 华航31号/金农丝苗	Developed in our laboratory	NA
KD052	Pure line	Advanced inbred line	华航31号/黄软占 // 华航31号/金农丝苗	Developed in our laboratory	NA
KD053	Pure line	Advanced inbred line	华航31号/黄软占 // 华航31号/金农丝苗	Developed in our laboratory	NA
KD054	Pure line	Advanced inbred line	华航31号/黄软占 // 华航31号/金农丝苗	Developed in our laboratory	NA
KD055	Pure line	Advanced inbred line	华航31号/黄软占 // 华航31号/金农丝苗	Developed in our laboratory	NA
KD056	Pure line	Advanced inbred line	华航31号/黄软占 // 华航31号/金农丝苗	Developed in our laboratory	NA
KD057	Pure line	Advanced inbred line	华航31号/黄软占 // 华航31号/金农丝苗	Developed in our laboratory	NA
KD058	Pure line	Advanced inbred line	华航31号选-1 / 粤农丝苗）F2-8-1-1-1-1-1	Developed in our laboratory	NA
KD059	Pure line	Advanced inbred line	华航31号选-1 / 粤农丝苗	Developed in our laboratory	NA
KD060	Pure line	Advanced inbred line	华航31号选-1 / 粤农丝苗	Developed in our laboratory	NA
KD061	Pure line	Advanced inbred line	华航31号选-1 / 粤农丝苗	Developed in our laboratory	NA
KD062	Pure line	Advanced inbred line	华航31号选-1 / 粤农丝苗	Developed in our laboratory	NA
KD063	Pure line	Advanced inbred line	华航油占/粤油丝苗/五山丝苗/胜巴丝苗	Developed in our laboratory	NA
KD064	Pure line	Advanced inbred line	华航油占/粤油丝苗/五山丝苗/胜巴丝苗	Developed in our laboratory	NA
KD065	Pure line	Advanced inbred line	丰泰占/黄丝占 // 黄软占	Developed in our laboratory	NA
KD066	Pure line	Advanced inbred line	丰泰占/黄丝占 // 黄软占	Developed in our laboratory	NA
KD067	Pure line	Advanced inbred line	丰泰占/黄丝占 // 黄软占	Developed in our laboratory	NA
KD068	Pure line	Advanced inbred line	丰泰早香10 / 金航油占	Developed in our laboratory	NA
KD069	Pure line	Advanced inbred line	丰泰早香10 / 金航油占	Developed in our laboratory	NA
KD070	Pure line	Advanced inbred line	丰泰早香10 / 金航油占	Developed in our laboratory	NA
KD071	Pure line	Advanced inbred line	丰泰早香10 / 金航油占	Developed in our laboratory	NA
KD072	Pure line	Advanced inbred line	YJSM/B370//YJSM/XHZ///华航37	Developed in our laboratory	NA
KD073	Pure line	Advanced inbred line	YJSM/B370//YJSM/XHZ///华航37	Developed in our laboratory	NA
KD074	Pure line	Advanced inbred line	YJSM/B370//YJSM/XHZ///华航37	Developed in our laboratory	NA
KD075	Pure line	Advanced inbred line	华航油占/B370//XHZ/H4///华航35	Developed in our laboratory	NA
KD076	Pure line	Advanced inbred line	CHA-1///胜巴16/CBB23// 胜巴16	Developed in our laboratory	NA
KD077	Pure line	Advanced inbred line	CHA-1///胜巴16/CBB23// 胜巴16	Developed in our laboratory	NA
KD078	Pure line	Advanced inbred line	胜巴16/CBB23// 胜巴16///新月糯	Developed in our laboratory	NA
KD079	Pure line	Advanced inbred line	胜巴16/CBB23// 胜巴16///新月糯	Developed in our laboratory	NA
KD080	Pure line	Advanced inbred line	胜巴16/CBB23// 胜巴16///新月糯	Developed in our laboratory	NA
KD081	Pure line	Advanced inbred line	Q-105 / 航恢香占	Developed in our laboratory	NA
KD082	Pure line	Advanced inbred line	Q-105 / 航恢香占	Developed in our laboratory	NA
KD083	Pure line	Advanced inbred line	Q-105 / 航恢香占	Developed in our laboratory	NA
KD084	Pure line	Advanced inbred line	五油//胜/C23///合丝////胜/C23//胜	Developed in our laboratory	NA
KD085	Pure line	Q-21	Q-21	Developed in our laboratory	NA
KD086	Pure line	Q-21	Q-21	Developed in our laboratory	NA
KD087	Pure line	Yue Jing Si Miao 2 HaO	粤晶丝苗2号	China	NA
KD088	Pure line	Hua Hang 39 Hao	华航39号	Developed in our laboratory	NA
KD089	Pure line	Advanced inbred line	粤晶丝苗2号 / 华香丝苗	Developed in our laboratory	NA
KD090	Pure line	Advanced inbred line	粤晶丝苗2号 / 华香丝苗	Developed in our laboratory	NA
KD091	Pure line	Advanced inbred line	黄华占/胜巴丝苗	Developed in our laboratory	NA
KD092	Pure line	Advanced inbred line	CHA-1/胜巴16	Developed in our laboratory	NA
KD093	Pure line	Advanced inbred line	华航31号选-1 / 新黄占	Developed in our laboratory	NA
KD094	Pure line	Advanced inbred line	粤美丝苗 / 三澳占	Developed in our laboratory	NA
KD095	Pure line	Advanced inbred line	CHA-1/胜巴47-1//胜巴16	Developed in our laboratory	NA
KD096	Pure line	Advanced inbred line	CHA-1 / 新红丝苗	Developed in our laboratory	NA
KD097	Pure line	Hong Li Si Miao (CK2)	红荔丝苗（CK2）	Developed in our laboratory	NA
KD098	Pure line	Advanced inbred line	华航31号选-红-1 / 红荔丝苗	Developed in our laboratory	NA
KD099	Pure line	Advanced inbred line	华航31号选-红-1 / 红荔丝苗	Developed in our laboratory	NA
KD100	Pure line	Yue Hong Bao (CK4)	粤红宝（CK4）	China	NA
KD101	Pure line	Advanced inbred line	红园粒-150///YJSM/B370//YJSM/XHZ	Developed in our laboratory	NA
KD102	Pure line	Advanced inbred line	红园糯/华航丝苗//红园糯/红荔丝苗	Developed in our laboratory	NA
KD103	Pure line	Advanced inbred line	X-73-红园糯	Developed in our laboratory	NA
KD104	Pure line	Advanced inbred line	X-74红园糯2/H4	Developed in our laboratory	NA
KD105	Pure line	Advanced inbred line	X-74红园糯2/H4	Developed in our laboratory	NA
KD106	Pure line	Advanced inbred line	X-73-74红园糯/H4	Developed in our laboratory	NA
KD107	Pure line	Advanced inbred line	X-73-74红园糯/H4	Developed in our laboratory	NA
KD108	Pure line	Advanced inbred line	红圆粒-73-改良-2	Developed in our laboratory	NA
KD109	Pure line	Hua Hang 36 Hao	华航36号	Developed in our laboratory	NA
KD110	Pure line	Hua Hang 37 Hao	华航37号	Developed in our laboratory	NA
KD111	Pure line	Jiang Hang Si Miao	江航丝苗	Developed in our laboratory	NA
KD112	Pure line	Hua Hang Si Miao	华航丝苗	Developed in our laboratory	NA
KD113	Pure line	Jin Hang Si Miao	金航丝苗	Developed in our laboratory	NA
KD114	Pure line	Hua Hang 31 Hao	华航31号	Developed in our laboratory	NA
KF001	Hybrid F1	F1-1	黄软秀占//华航31号/ 金农丝苗	Developed in our laboratory	NA
KF002	Hybrid F1	F1-2	黄软秀占/华航31号	Developed in our laboratory	NA
KF003	Hybrid F1	F1-3	南丰占/华航31号	Developed in our laboratory	NA
KF004	Hybrid F1	F1-4	合莉油占/南丰占	Developed in our laboratory	NA
KF005	Hybrid F1	F1-5	南丰占/粤新油占-1	Developed in our laboratory	NA
KF006	Hybrid F1	F1-6	黄广新占/粤新油占-1	Developed in our laboratory	NA
KF007	Hybrid F1	F1-7	粤新油占-1/X-767	Developed in our laboratory	NA
KF008	Hybrid F1	F1-8	黄广新占/X-768	Developed in our laboratory	NA
KF009	Hybrid F1	F1-9	黄粤丝苗/新丰占	Developed in our laboratory	NA
KF010	Hybrid F1	F1-10	新丰占//华航油占/ 黄软占	Developed in our laboratory	NA
KF011	Hybrid F1	F1-11	黄广丝苗//华航油占/ 黄软占	Developed in our laboratory	NA
KF012	Hybrid F1	F1-12	黄广丝苗/小768	Developed in our laboratory	NA
KF013	Hybrid F1	F1-13	乡意浓1号/表-16	Developed in our laboratory	NA
KF014	Hybrid F1	F1-14	大丰糯高/X-361	Developed in our laboratory	NA
KF015	Hybrid F1	F1-15	丰路丝苗/本-266	Developed in our laboratory	NA
KF016	Hybrid F1	F1-16	粤美占/华航39号	Developed in our laboratory	NA
KF017	Hybrid F1	F1-17	合莉丝苗/粤标5号	Developed in our laboratory	NA
KF018	Hybrid F1	F1-18	大丰糯高/小-560	Developed in our laboratory	NA
KF019	Hybrid F1	F1-19	X-560/X-182	Developed in our laboratory	NA
KF020	Hybrid F1	F1-20	X-560/X-182	Developed in our laboratory	NA
KF021	Hybrid F1	F1-21	丰路丝苗/X-563	Developed in our laboratory	NA
KF022	Hybrid F1	F1-22	黄广丝苗/小-563	Developed in our laboratory	NA
KF023	Hybrid F1	F1-23	X-563/深两优航香	Developed in our laboratory	NA
KF024	Hybrid F1	F1-24	X-833/X-845	Developed in our laboratory	NA
KF025	Hybrid F1	F1-25	X-850/X-845	Developed in our laboratory	NA
KF026	Hybrid F1	F1-26	X-856/X-843	Developed in our laboratory	NA
KF027	Hybrid F1	F1-27	X-857/X-844	Developed in our laboratory	NA
KF028	Hybrid F1	F1-28	X-858/X-845	Developed in our laboratory	NA
KF029	Hybrid F1	F1-29	粤黄广占肇庆引/增城丝苗	Developed in our laboratory	NA
KF030	Hybrid F1	F1-30	增城丝苗/皓豫3号	Developed in our laboratory	NA
KF031	Hybrid F1	F1-31	增城丝苗/桑兰稻—糯	Developed in our laboratory	NA
KF032	Hybrid F1	F1-32	增城丝苗/桑兰稻—红	Developed in our laboratory	NA
KF033	Hybrid F1	F1-33	增城丝苗/本-306	Developed in our laboratory	NA
KF034	Hybrid F1	F1-34	增城丝苗/华航39号	Developed in our laboratory	NA
KF035	Hybrid F1	F1-35	增城丝苗/X-766	Developed in our laboratory	NA
KF036	Hybrid F1	F1-36	增城丝苗/X-767	Developed in our laboratory	NA
KF037	Hybrid F1	F1-37	增城丝苗/X-768	Developed in our laboratory	NA
KF038	Hybrid F1	F1-38	开平X优粒/云粳22	Developed in our laboratory	NA
KF039	Hybrid F1	F1-39	X-510/兴宁黑粘	Developed in our laboratory	NA
KF040	Hybrid F1	F1-40	粤红宝/华引-红-2	Developed in our laboratory	NA
KF041	Hybrid F1	F1-41	泰丰B/本-308	Developed in our laboratory	NA
KF042	Hybrid F1	F1-42	恒丰B/恒丰优	Developed in our laboratory	NA
KIR-001	Pure line	Kinanda	NA	IRRI	44514
KIR-002	Pure line	PSBRC 4	NA	IRRI	88284
KIR-003	Pure line	NSIC RC 11	NA	IRRI	NA
KIR-004	Pure line	Te Qing	特青	IRRI	78727
KIR-005	Pure line	BR 7232-6-2-3	NA	IRRI	NA
KIR-006	Pure line	BG 367-2	NA	IRRI	NA
KIR-007	Pure line	OM 5629	NA	IRRI	NA
KIR-008	Pure line	IR 36	NA	IRRI	117416
KIR-009	Pure line	OM 5628	NA	IRRI	NA
KIR-010	Pure line	WAB 878Sg33	NA	IRRI	NA
KIR-011	Pure line	Milyang 63	NA	IRRI	61882
KIR-012	Pure line	6527	NA	IRRI	NA
KIR-013	Pure line	Meghi	NA	IRRI	46335
KIR-014	Pure line	CR 547-1-2-3	NA	IRRI	NA
KIR-015	Pure line	PK 7392-1-1-1-1-1	NA	IRRI	NA
KIR-016	Pure line	926	NA	IRRI	NA
KIR-017	Pure line	IR 7495-Ac45	NA	IRRI	NA
KIR-018	Pure line	Jawariya	NA	IRRI	54063
KIR-019	Pure line	CT 17379-32-5-1-1-5-M	NA	IRRI	NA
KIR-020	Pure line	IR-BB56 (IR72918-37-1-1)	NA	IRRI	NA
KIR-021	Pure line	FFZ 1	NA	IRRI	NA
KIR-022	Pure line	Dayakon	NA	IRRI	71515
KIR-023	Pure line	PR 35766-B-24-3	NA	IRRI	NA
KIR-024	Pure line	Mala	NA	IRRI	NA
KIR-025	Pure line	IR 6616-121-4-4-2	NA	IRRI	NA
KIR-026	Pure line	OMCS 29	NA	IRRI	NA
KIR-027	Pure line	Nigeria 5	NA	IRRI	72938
KIR-028	Pure line	OM 6378	NA	IRRI	NA
KIR-029	Pure line	Radha 4	NA	IRRI	NA
KIR-030	Pure line	NR 11	NA	IRRI	NA
KIR-031	Pure line	Milyang 46 (Cheongcheongbyeo)	NA	IRRI	NA
KIR-032	Pure line	PR 33319-9-1-1-5-3-5-4-1	NA	IRRI	NA
KIR-033	Pure line	IR 24	NA	IRRI	126446
KIR-034	Pure line	OM 66	NA	IRRI	NA
KIR-035	Pure line	Zhongzu 14	NA	IRRI	NA
KIR-036	Pure line	IRRI 129	NA	IRRI	122461
KIR-037	Pure line	Padi Liwagu	NA	IRRI	110722
KIR-038	Pure line	OM 49	NA	IRRI	NA
KP-001	Pure line	IR 101861-28-1	NA	IRRI	NA
KP-002	Pure line	IR 101866-8-1	NA	IRRI	NA
KP-003	Pure line	IR 101867-27-1	NA	IRRI	NA
KP-004	Pure line	IR 101868-11-3	NA	IRRI	NA
KP-005	Pure line	IR 101869-4-1	NA	IRRI	NA
KP-006	Pure line	IR 101875-13-2	NA	IRRI	NA
KP-007	Pure line	IR 101876-14-1	NA	IRRI	NA
KP-008	Pure line	IR 101878-41-1	NA	IRRI	NA
KP-009	Pure line	IR 101882-7-1	NA	IRRI	NA
KP-010	Pure line	IR 98071-8-8-1	NA	IRRI	NA
KP-011	Pure line	IR 98072-8-2-1	NA	IRRI	NA
KP-012	Pure line	IR 96545-10-5-1-1	NA	IRRI	NA
KP-013	Pure line	IR 96572-35-1-2-1	NA	IRRI	NA
KP-014	Pure line	IR 96574-150-1-1-1	NA	IRRI	NA
KP-015	Pure line	IR 96594-2-1-1-1	NA	IRRI	NA
KP-016	Pure line	IR 96597-7-1-2-1	NA	IRRI	NA
KP-017	Pure line	IR 96597-13-1-1-1	NA	IRRI	NA
KP-018	Pure line	IR 96632-1-1-2-1	NA	IRRI	NA
KP-019	Pure line	IR 96701-27-3-1-1	NA	IRRI	NA
KP-020	Pure line	IR 96703-11-1-2-1	NA	IRRI	NA
KP-021	Pure line	IR 96706-55-2-2-1	NA	IRRI	NA
KP-022	Pure line	IR 96674-71-1-1-1	NA	IRRI	NA
KP-023	Pure line	IR 96674-84-1-3-1	NA	IRRI	NA
KP-024	Pure line	IR 95729-2-2-1-1-1	NA	IRRI	NA
KY001	Pure line	2001 IR 77298-14-1-2	NA	IRRI	NA
KY002	Pure line	2002 IR 77736-54-3-1-2	NA	IRRI	NA
KY003	Pure line	2003 IR 78554-145-1-3-2	NA	IRRI	NA
KY004	Pure line	Z006 CT 17379-32-5-1-1-5-M	NA	CIAT	NA
KY005	Pure line	Z007 IR 09A228	NA	IRRI	NA
KY006	Pure line	Z009 Neamat	NA	Vietnam	NA
KY007	Pure line	Z010 OM 5338	NA	Vietnam	NA
KY008	Pure line	Z011 OM 5628	NA	Vietnam	NA
KY009	Pure line	Z013 Radha 4	NA	Nepal	NA
KY010	Pure line	Z014S 3429-4D-Pn-1-1-2	NA	Indonesia	NA
KY011	Pure line	CT 15672-3-2-3-2-2-M	NA	CIAT	NA
KY012	Pure line	OM 6073	NA	Vietnam	NA
KY013	Pure line	YN 3109-23-1-2	NA	Burma	NA
KY014	Pure line	IR 76928-74-3-2-1	NA	IRRI	NA
KY015	Pure line	IR 71701-28-1-4	NA	IRRI	NA
KY016	Pure line	IR 78545-49-2-2-2	NA	IRRI	NA
KY017	Pure line	Cimelati	NA	Indonesia	NA
KY018	Pure line	IR 80098-40-3-1-2	NA	IRRI	NA
KY019	Pure line	IR 82220-17-3-1	NA	IRRI	NA
KY020	Pure line	IR 82228-12-2-1-2	NA	IRRI	NA
KY021	Pure line	Yunlen 14	NA	IRRI	88423
KY022	Pure line	IR 84233-30-2-2	NA	IRRI	NA
KY023	Pure line	IR 84233-30-2-3	NA	IRRI	NA
KY024	Pure line	PSBRC 2 (IR32809-26-3-3)	NA	IRRI	NA
KY025	Pure line	IR 81423-B-B-111-3	NA	IRRI	NA
KY026	Pure line	IR 78877-048-B-B-2	NA	IRRI	NA
KY027	Pure line	CT 15765-18-1-5-2-2-M	NA	CIAT	NA
KY028	Pure line	IR 70175-22-1-1-2-2	NA	IRRI	NA
KY029	Pure line	CT 15691-4-3-4-5-1-M	NA	CIAT	NA
KY030	Pure line	IR 78914-B-22-B-B-B	NA	IRRI	NA
KY031	Pure line	IR 72873-12-2-2-1	NA	IRRI	NA
KY032	Pure line	IR 55423-01	NA	IRRI	NA
KY033	Pure line	PR 26703-3B-PJ7	NA	South Korea	NA
KY034	Pure line	IR 79913-B-176-B-4	NA	IRRI	NA
KY035	Pure line	IR 78875-176-B-1-B	NA	IRRI	NA
KY036	Pure line	Kun Jing 4Hao	昆粳4号	China	NA
KY037	Pure line	Nan Jing 16Hao	南京16号	China	NA
KY038	Pure line	Dong Jin Dao	NA	South Korea	NA
KY039	Pure line	Yi Pin Dao	NA	South Korea	NA
KY040	Pure line	Xin Zhu 4Hao	新竹4号	China	NA
KY041	Pure line	IR 80707-69-1-3-3	NA	IRRI	NA
KY042	Pure line	An Nong Wan Jing B	安农晚粳B	China	NA
KY043	Pure line	Ning Jing 37Hao	宁粳37号	China	NA
KY044	Pure line	Han 526	旱526	China	NA
KY045	Pure line	He Xi 15	合系15	China	NA
KY046	Pure line	80A86Yr72154-17	NA	Australia	NA
KY047	Pure line	IRAT 4	NA	Ivory Coast	NA
KY048	Pure line	ITA 148	NA	Nigeria	NA
KY049	Pure line	CNG 213B	NA	CNRRI	NA
KY050	Pure line	CNG 933B	NA	CNRRI	NA
