# Supplementary material for: Development of a core SNP arrays based on the KASP method for molecular breeding of rice
Source: Rice (N Y). 2019 Apr 8;12:21. doi: 10.1186/s12284-019-0272-3 (PMC6453994; doi:10.1186/s12284-019-0272-3)
Supplement: Supplementary file 11 — Table S11. KASP assay primers used in the study. (XLSX 39 kb) [file 12284_2019_272_MOESM11_ESM.xlsx]

## Sheet: Table S11
Table S11 KASP assay primers used in the study
ID	Chr.	Primer_AlleleFAM	Primer_AlleleHEX	Primer_Common
SK01_13343177	1	CCTTGTCGTCGTCCGGAAAGAT	CTTGTCGTCGTCCGGAAAGAC	GAGGACAACACCGTCCTTAAGTACAA
SK01_2726468	1	CGAGGTACCATGCAATCGTGACT	GAGGTACCATGCAATCGTGACC	CCGTTGGTGATGCCCGATCGAA
SK01_37933342	1	TAGAAAAAACTCTATTGCCCACCGTT	AGAAAAAACTCTATTGCCCACCGTC	GCAGGCTTTAGGGAAAAAAAACCTGTAAA
SK01_42357534	1	CTATTTTTCGTACACATTTCCTCCA	CTATTTTTCGTACACATTTCCTCCC	CTAGTGATCAGGGCTCGTTCAGAA
SK01_42581030	1	CCATCCAGGTCACAAGACTGAAT	CCATCCAGGTCACAAGACTGAAC	CTACAAAATCAATCACAGTTTCTGTCTGAA
SK01_9423941	1	CAACGAGCTTCTCGATCCAATCA	CAACGAGCTTCTCGATCCAATCC	GGCTAGGTGGCGTAGCAGGAAA
SK01_1175585	1	GCAAATATACCTAGGGCTAAATGCCA	CAAATATACCTAGGGCTAAATGCCG	GCTTGTTTTTACCACTGGGTTTATGGAA
SK01_13245925	1	AACATTGTTCTCTATGACCATACAGAC	AACATTGTTCTCTATGACCATACAGAG	GAACGAAGAGCAAGCTGAAGCACAA
SK01_19269700	1	GGCAGTACTGTGTTGCTCATGG	AGGCAGTACTGTGTTGCTCATGA	CAAGTGCAATTGGAATCTGGAATATCGTA
SK01_25673334	1	GTCGGATTTGCCGGAGTTTTGC	TGTCGGATTTGCCGGAGTTTTGT	GACGCTAGAATTTTTCGAATTGACCTGTT
SK01_7854101	1	TCCTAGCCTCTGACCTTGCAT	CCTAGCCTCTGACCTTGCAC	GGTTTTAGGTTGCTGTTGCTGCTTTAATT
SK01_20022126	1	GGATGCCACCATGGCACCAATTA	GATGCCACCATGGCACCAATTG	GGGAGATGAACTTAGGAAGCAGAGAA
SK01_22453166	1	AATGAACATGAATTTATGAGAAAACTCTTTTGA	AATGAACATGAATTTATGAGAAAACTCTTTTGT	AAAAGGAGTGGAGTGCAACATATACCAT
SK01_2287476	1	GGCCCGACTTCATGACGGCT	GCCCGACTTCATGACGGCC	CTTTTGTGTTCGAGGATGTTACTTCCTTT
SK01_25148569	1	GAAATTTATAATCCTGCAGCTGTAAGTGA	AATTTATAATCCTGCAGCTGTAAGTGG	CCCAAAGACAATGAACTGCGTAATCTAAA
SK01_36683412	1	CCACAAAGTAATTAAACAGTATGCTCCA	CACAAAGTAATTAAACAGTATGCTCCG	CCTTACAAGAAGCATACTAACTTTACCAAT
SK01_38959045	1	ATTTGCATGCCTGCCTCTCGATTA	TGCATGCCTGCCTCTCGATTT	GTACAAGGGAAAGGGCACCATGAAT
SK01_41026337	1	CACATATTGTTCTTTTATTCAGCACATGAAA	ACATATTGTTCTTTTATTCAGCACATGAAG	AACTTCAGCATGTCAACTACGAGAAGAAA
SK01_43200421	1	GAGAGGCAGGCGACGTGCA	AGAGGCAGGCGACGTGCC	GCATGAGGAGCGGAGGAGACAA
SK01_8924578	1	ATTTTGATTTTACACAGAATGCATCGGAAA	TTGATTTTACACAGAATGCATCGGAAT	GCACATGAATGAAGGGCGTTGGAAT
SK01_5264642	1	AACATGATAGTCAGATTGGCTGCC	ATAACATGATAGTCAGATTGGCTGCT	TGTCTGAGTTTCCATACTACTGTGCTA
SK01_5290075	1	AATATTGACCTGTTGGGACAGCAG	AATATTGACCTGTTGGGACAGCAC	GGGAATGCATATTGCACTTCAACAGTTTA
SK01_5317048	1	CCAAACCTGCTTACAAACTAATTGTCTTA	CAAACCTGCTTACAAACTAATTGTCTTC	GTTGACAAGCGGGTATGCACTGTTT
SK01_5438204	1	CCTCCGTTAGTAGGCCTTCCAA	CTCCGTTAGTAGGCCTTCCAG	GGTCATTCAAATCATTTGACTCCATTGCAA
SK01_5442863	1	GCACACGAGTCACTGACACGA	GCACACGAGTCACTGACACGC	CGGCGAGAAACCCTAGTGGAGAA
SK01_1050097	1	AATTGTGCATCATTGGTCTTGTTATAAATATA	GTGCATCATTGGTCTTGTTATAAATATC	AGTATGAATCCCATGCAAACTACAGGTTT
SK01_11459523	1	AGGAGTATGTAACATATAGTTAGTTTACAC	CAGGAGTATGTAACATATAGTTAGTTTACAT	GGAAAATCCACATCCACGGAGATAATATA
SK01_1625482	1	GTTGCATTTTAGATAAAGGAAGTACAGTTA	GTTGCATTTTAGATAAAGGAAGTACAGTTT	AATCATTCAGTTATCCCATTCTGAAGCTAT
SK01_18944486	1	CATTGATCCGATGCTATGCTCTCA	GATCCGATGCTATGCTCTCG	CTCTGCACTACGCAAGGAGTTCAAA
SK01_22380833	1	AGGTTCACAATGTTAACCATGAGATTG	CAGGTTCACAATGTTAACCATGAGATTA	GGCAATTGGTGTACTTGTCAAGAGATATA
SK01_22955593	1	ATGTGTCGAAAATGGAACAGTGCAC	AATGTGTCGAAAATGGAACAGTGCAA	GGAGCTAGTTCTGAAGCTTGAGGTA
SK01_25384027	1	CGAAGAGGAAGATCTCGGCA	CGAAGAGGAAGATCTCGGCG	TTCGTCCACCTCGACGACCTCT
SK01_28137217	1	AAAATACATTTACACATCAATGTATGAGTTCTA	ATACATTTACACATCAATGTATGAGTTCTG	GCTTTATTCGTAGGCATGTGCTCACAT
SK01_35558484	1	CCAGCATGGACACCGTG	GCTCCAGCATGGACACCGTT	TCGTGCCGGGCGGCAGCAA
SK01_36445259	1	ATTGAAGCTTCAGCTACTTTAGTACATTTA	GAAGCTTCAGCTACTTTAGTACATTTG	TGATGTTATGGCCAAAAAGTGAGGTGAT
SK01_39525573	1	GAAGCATGGAGGCCGTCATTGT	AAGCATGGAGGCCGTCATTGC	GCACACACTGTCCACGCCCAAT
SK01_4004196	1	CGCCGATCCTCCTCTCC	CTCTCGCCGATCCTCCTCTCT	GCGAGGAGGTCGCCGGAGT
SK01_41822712	1	TCAAACAGAAACTCCATCACCAG	CCTTCAAACAGAAACTCCATCACCAA	GAGGTATGTATCATCTTGACAATCAGGAT
SK01_5273672	1	ATAGTATCTAATCTTTGTCTCTCCGA	ATAGTATCTAATCTTTGTCTCTCCGG	GCTATCACACACCTAACTGGAAGTAATTA
SK01_7027262	1	GTGGAGCATTAAAAATTTGAAATCATTAGG	CAGTGGAGCATTAAAAATTTGAAATCATTAGA	GATCAAGTACACCATTRACAGCTGTGTA
SK01_8657303	1	CCCCGGAAACCCTAAACCCAAAT	CCCGGAAACCCTAAACCCAAAC	CGCGAATGTCTGAACGCGGCAA
SK01_10438894	1	TTAAAAGATGAGAAATTTGTTCTACCTGG	GTTTTAAAAGATGAGAAATTTGTTCTACCTGA	AGTTTGAATCATGTCCCTCAACCGAAAA
SK01_16144280	1	CATAGAGCTACAGGAAGGAGTCTT	ATAGAGCTACAGGAAGGAGTCTC	TTGTATTTGTTCACCCCAGGTCTTTCAA
SK01_17540508	1	ACCACACAGGTAAATTGGTATGTACT	CCACACAGGTAAATTGGTATGTACC	CTTTGAAATTCAAACATGCGATGATACAAA
SK01_24056268	1	CCACTACCGGTTCACTGGTTCT	CACTACCGGTTCACTGGTTCC	TTAAAAACCGATGAACCGGACGGTTTTAT
SK01_26880460	1	AGACCAAGCATTTGCCTCGTACAT	GACCAAGCATTTGCCTCGTACAC	ATCTGCTTTGGACGCGGTGAAGTTT
SK01_32284104	1	CGGTGAGCTTTACATTCTAAGAAATAGA	GGTGAGCTTTACATTCTAAGAAATAGG	GGAGAAGCTGGGTTTCAGAGCTTTT
SK02_1000481	2	AGCTATTCGTTTGCACAGTGCTCT	GCTATTCGTTTGCACAGTGCTCG	GTGGCCATCAGCGGCAGCTTT
SK02_10167522	2	TGCCACAGCCACTACAGTGT	GCCACAGCCACTACAGTGC	GATTTGGCGCACGGGCCATGAT
SK02_23599651	2	CAAAAACCAACTTTAAAACCAGCATGG	CAAAAACCAACTTTAAAACCAGCATGC	CCTGAGGATAGAATTAATAGGTCACTCAA
SK02_24720321	2	ATAACACCATGGACAAGTCATCTGAT	AACACCATGGACAAGTCATCTGAC	CTTCCGTTCCTTTCAGTGAGCTTTCAT
SK02_30295035	2	TCCGGGCCTCTGGATTTCAATT	CCGGGCCTCTGGATTTCAATC	CTTGCCTCACTGTCATCCTTCAGAA
SK02_35933995	2	GGTACCAATATTTGTCAAACATATAGCTTAT	GTACCAATATTTGTCAAACATATAGCTTAC	GCCAGTACTGATGATAAGGTCTGGTT
SK02_8978321	2	AAATGGTCTAGATTACTGTCTTTCATACA	ATGGTCTAGATTACTGTCTTTCATACG	TGCGGTATGTGTAGAAATTCACTTGGTT
SK02_17497082	2	AAGAAATTAAATATACTGATTTAGTACTGCACA	GAAATTAAATATACTGATTTAGTACTGCACG	GCCCAACTCGGGCACAATTATATCAT
SK02_22334916	2	AAGTTGATCTGACTGCCATGTACAATA	GTTGATCTGACTGCCATGTACAATG	TTGAGAAATATGTGTCACTACCCCTTGTT
SK02_27208843	2	AACATAATAAGAATATTGGCAAACACGTGA	CATAATAAGAATATTGGCAAACACGTGC	GCTTCTCACTGTGTTTCACCATTTCTTT
SK02_3230775	2	ATTTCCAATGGAAAGTGGATACTGCA	TCCAATGGAAAGTGGATACTGCC	CAGGTGTGAACCTTATTTAACTTGGTGAT
SK02_33082359	2	AGTAGCTGGTGCTGGTGCTATC	AGTAGCTGGTGCTGGTGCTATG	TGTGTCCCGGTAGATACAGGTCTTA
SK02_8701699	2	GAAGCAATATCAGGTAAATCCCACCA	AAGCAATATCAGGTAAATCCCACCG	CATGAGCTGCTCTGTGCTACCAATT
SK02_20351059	2	CCGTCCTCCTATCCAAAGTAACAAA	CGTCCTCCTATCCAAAGTAACAAC	GGTGCTGCACTACAGCCCTCAT
SK02_32060976	2	TGTAGACCCTATCATTGCCTGTGT	GTAGACCCTATCATTGCCTGTGC	CTTGTCTGTGTAGACCATAGAGGCAA
SK02_4605390	2	CCTATGGATAACTGGTGGATTGCAA	CTATGGATAACTGGTGGATTGCAG	TTAACCAGGGGATTAGAATATCTTCATGAA
SK02_1076260	2	GTCAGTTGCAGCATTCACAAGG	AGTGTCAGTTGCAGCATTCACAAGA	AACTTATCCTGTCCTGACAGCAAGAAAA
SK02_1090736	2	CACTCCACCTCCTTCAGGATTCT	ACTCCACCTCCTTCAGGATTCC	GGTTTCGTAAATCTCGACGAGAGGTT
SK02_11999446	2	TTCCTTAACAAGCCAATGTTTGGGTT	CCTTAACAAGCCAATGTTTGGGTC	GTCCACCAAACATTACATAAAGCAGATAAA
SK02_17152814	2	GACCAGTCGATCAAGAATTCTG	CCTGACCAGTCGATCAAGAATTCTA	GAAGTCTGAATGTTCTGTTAAAGATGCGAA
SK02_20720720	2	GTATCAGCCTCATTCCCTTCTGG	AGTATCAGCCTCATTCCCTTCTGA	GCTCGCGGAGACGCCGGAA
SK02_21610852	2	CCTATGACGGTGGCGGTGC	GCCTATGACGGTGGCGGTGT	TAAAGTCAGAGGGACATGTACCCATAATA
SK02_22336215	2	CCAATTCACAAATAATGAAATAGAATGCA	CCAATTCACAAATAATGAAATAGAATGCC	GCTTGCAATCTTGCAAAGCAGGTTTAATT
SK02_24100885	2	GTGAAAATGATGAAATATAATCAGGAACAC	TGTGAAAATGATGAAATATAATCAGGAACAT	CAGCATACCGTCCAATCAATTTACTGTTT
SK02_24236917	2	ATGTTTAACAAAGCAGCACTGTCTTC	GATGTTTAACAAAGCAGCACTGTCTTT	CGTAATGACATTTGCACAGGGGAAATTAT
SK02_24517313	2	GTAATTAAAGTGCACGAGATCGCCT	AATTAAAGTGCACGAGATCGCCC	TGAACTAGTACACTACTCTACTACTGCTA
SK02_27883376	2	CCGCATACGTGCAGCCGC	GCCGCATACGTGCAGCCGT	TTTGCAAGGTGGGTTCAGAGTCCAT
SK02_2879584	2	GGTGAAGATCCTTGTAGTGTCATCAT	GTGAAGATCCTTGTAGTGTCATCAC	GAGAAATATGCATCATATGATTGGACCAAT
SK02_28920026	2	AGAAATATGATGTACAGGCAGACTCTT	GAAATATGATGTACAGGCAGACTCTG	GAGAAGGAGACCACTTTGGAGCTTT
SK02_29343781	2	AATGACAGAAGCAAAGCAACACCG	GAATGACAGAAGCAAAGCAACACCA	GAAAGGAACATAATTGGGCTAGCTGTTAT
SK02_30869769	2	AGGAGTCTGGATTATTCTACATGCG	GAGGAGTCTGGATTATTCTACATGCA	TGCAGTTTCTTGCTCAATTACACAACGAT
SK02_31269371	2	CGAGAGCGTGCCCATGACC	CCGAGAGCGTGCCCATGACT	GTTCGACGGCCTGTGGATCTACTT
SK02_32531138	2	AATCTAAGCTGTCTACATGCTTGCAAT	CTAAGCTGTCTACATGCTTGCAAC	CCATTGCGCGCTTGATAGTTTGGTA
SK02_34687983	2	AGAATCTCAAGCTAGCTAGCCTAATTA	AGAATCTCAAGCTAGCTAGCCTAATTT	CTTGCAAATCCCCCAGACTAAAACAAATA
SK02_35115567	2	CCACCAGGATGGCTTCTTCAG	GCCACCAGGATGGCTTCTTCAA	CAGCCTCCAGGATTTTGCTGTTCAT
SK02_5029300	2	CGCACCCTCGCCACTGCG	CGCACCCTCGCCACTGCA	ACGATGGCGTCCGCCACGAT
SK02_5786547	2	CAGTCTCTTGAAACAGCAGG	GCTCAGTCTCTTGAAACAGCAGT	CTTCACAGCCACGAAGAACATGAATTAAT
SK02_7468550	2	GTATGCACTCTTCATAACTGATTAGCA	ATGCACTCTTCATAACTGATTAGCG	GCTTGGTGACTATTCAGATTTTCCCTAA
SK02_8119760	2	TCAGAGCATTTTGCGAGTTCTGAC	AATTCAGAGCATTTTGCGAGTTCTGAT	CTGCTTGTGCAGACTAGATCTTGCAT
SK02_9044730	2	ATGGTTGGATAATAGAGGGAGGGAT	ATGGTTGGATAATAGAGGGAGGGAA	TCAGCAAGAATTGTTCTTGTGTATGGCAT
SK02_15775411	2	CCTTAAAATTTGGCGGTTTTGGACG	AACCTTAAAATTTGGCGGTTTTGGACT	AGCGGCACCTGGTTTGTTCATGTTT
SK02_18870899	2	ATTTCTAAACTTTTAGACCACCTTGCC	AAATTTCTAAACTTTTAGACCACCTTGCT	CACTTCTAATATAAGGGCTGCAGCAAAAT
SK02_1968779	2	ATTGAATGGATTGACATGGCTGGCA	GAATGGATTGACATGGCTGGCG	TGAGGGCATATTAAAGCAACACAGACATT
SK02_33923958	2	ATCAGTGACGCAGTGGAGGTGA	CAGTGACGCAGTGGAGGTGC	AATCGTCTCTGGAATATGGATGGATCAT
SK03_13224089	3	CCTTTGCTGCTTCGACAACTTCT	CCTTTGCTGCTTCGACAACTTCC	GATCTGATTGGAGATGAAGATAAGGCAAA
SK03_18053119	3	CATTCGGAGTACGGACGACGA	CATTCGGAGTACGGACGACGC	CACTCTGCTATATCCATGCAGGTGAA
SK03_22641657	3	CACTGGCTCAGGGACATGCCT	CTGGCTCAGGGACATGCCC	ATGTCCCTGAGAAATCTGAACTGAAGAAA
SK03_27773851	3	CCAGAGGGAATAGCAAACAATTTTGTTT	CAGAGGGAATAGCAAACAATTTTGTTC	GGACAAAGGGAGTACTTTGTATTGTAAATA
SK03_32674916	3	CATGTTCTTCTTGCAACCTTGTCTGA	ATGTTCTTCTTGCAACCTTGTCTGC	CTTATGCAATTGGTGGTATTTCACATGAAT
SK03_33693747	3	CCTGAGTCCTGCCCGCT	CCTGAGTCCTGCCCGCC	GGGAGGGACTACATCATAGGTGAAA
SK03_14603458	3	GTATGCTTGTTCACACGCTTAAGTG	GTATGCTTGTTCACACGCTTAAGTA	CAGTTAATTAACTGTCCACTTGCACAGTA
SK03_19862435	3	AATTGTAAGTTTAGACCTATCTATGCG	ACTAATTGTAAGTTTAGACCTATCTATGCA	CATCCAATTTTACCTGTTCTACCGTCAA
SK03_22264563	3	TGAATTGTTTGTCATGGCTCTC	GCTTGAATTGTTTGTCATGGCTCTG	CATAAGCCTCTAGATGAAGGTGTTAGTTT
SK03_27054692	3	TTTTCCTGGGGTGCCCACTG	CTTTTTCCTGGGGTGCCCACTT	CCAGCCAGCCAGCAACAGAAGAT
SK03_5452580	3	GGCCAGAAGGCAATGCTATGC	AATGGCCAGAAGGCAATGCTATGT	ACGGAGGGAGTACTTTCTACGACAT
SK03_9913627	3	GAAACATGCATGAGCTCGTCCTTA	GAAACATGCATGAGCTCGTCCTTT	ACCGGCCGGCCTCGCTGTA
SK03_15397382	3	GCATAATATTGCATGTATTGCATCTGTT	GCATAATATTGCATGTATTGCATCTGTG	GAATCTGACAACCCCAACCACTTCAT
SK03_2086941	3	GATTGTGAGTAAAATGTAAACGCCTTAAAT	GTGAGTAAAATGTAAACGCCTTAAAC	GAGTGTTGTGTCCATAGACTGCATTATTT
SK03_31881886	3	AGCATCATCAACAAGAAGTACCAAGAT	GCATCATCAACAAGAAGTACCAAGAC	TTTACTCTTTTTTTGTGGGGGCAAACCTT
SK03_422648	3	TTACGTGATGCTTCCAGGCG	TCTTTACGTGATGCTTCCAGGCA	GCAGAGAAGAGTCAGTTGGAGGAA
SK03_16733441	3	AGCAGGCTGGCTTACTCTCTG	CAGCAGGCTGGCTTACTCTCTT	CAGGGTGAAATAAATTCAATCGAAGGGAT
SK03_14904428	3	TAAAAAATGCAAAATATAATTTATGCTCCTT	CTTAAAAAATGCAAAATATAATTTATGCTCCTC	ATGCAAAACTTCAGCTTTGCAGCCATTTT
SK03_14932671	3	TAATTAGTTAATTATTGTTGGACCATTAG	AGCTTAATTAGTTAATTATTGTTGGACCATTAA	GCCCTTAAATTTACAGCGCGCCAAA
SK03_14990404	3	GGTTCTAACTTTATCTGGCAGGAG	GGTTCTAACTTTATCTGGCAGGAC	CAGTGAAGTTAAGAAGGTGCATTTGTCAT
SK03_15001183	3	TAAGATCCGGGTGGTGTCAGTT	AAGATCCGGGTGGTGTCAGTC	GCAGAGTAATGGGAAGGCATGCATA
SK03_15074046	3	GGTACAATATGATAAGTGCATTGCAC	TTGGTACAATATGATAAGTGCATTGCAT	GATCTTCATACAACTCTTTCCGGCGAA
SK03_15106953	3	AGGACAGCTCGAAATGGCTCCT	GGACAGCTCGAAATGGCTCCG	CCTTAGTACTGCCATTTTCATTCATCTAAT
SK03_11025459	3	CAAAGAGAGTGACCAGCCAAC	ACTCAAAGAGAGTGACCAGCCAAT	GACTGAAGACCCCACCTATTTAAGTATAA
SK03_13156156	3	ACTCGCCGGTGTCCGGG	GTACTCGCCGGTGTCCGGA	GGTACTACGCGTCGGAGAGCAT
SK03_17262406	3	CAGGTATTGACCTTGAATTGAGAGGA	AGGTATTGACCTTGAATTGAGAGGG	GTTGGTCAGTAAATGTGGAAATTGTTTCTT
SK03_1789405	3	ACCGCCACATGGACGGC	GACTACCGCCACATGGACGGT	CGGTTGACGAGCGTGTAGGTGTT
SK03_19245532	3	GACCTGACATGGGTGGTGTTGA	GACCTGACATGGGTGGTGTTGT	AAACTGGACAAGGAAATGGTTTGCAGAAA
SK03_220026	3	ACCTGCAGATCGATCTCGATCTT	ACCTGCAGATCGATCTCGATCTA	ACTGGCTAGSAAGCAAAGCTAGGTA
SK03_22234816	3	CCGTGAATGCTACTTAATTCAACCATTTT	CGTGAATGCTACTTAATTCAACCATTTC	TGTGCCATTGTATAGCACTGTATGGAAA
SK03_22542344	3	GATGGACCAAAAGAATACAGGAGCA	ATGGACCAAAAGAATACAGGAGCG	ACCATTAGGAAGCTAATGTAGATTGCCAT
SK03_2373946	3	TTCCTATTCACCTGTCAAAACTTGTC	AATTTTCCTATTCACCTGTCAAAACTTGTT	TGGAATCCAAAGGATAAGATAAGTTCACAA
SK03_24702097	3	CCCCAATCTGCCTTTGCGTC	GTCCCCAATCTGCCTTTGCGTT	CCTGTGAGCAACATTAATCCGTAGTATTA
SK03_26206682	3	TTCACTATCAAATTATGCTTTCTGTATC	CCTTTCACTATCAAATTATGCTTTCTGTATT	ATTCAGCAAACTGCCGTGACGCTT
SK03_2727136	3	GGCGCCGACGTCCTGGTG	GGCGCCGACGTCCTGGTT	GGCGGCGGCGCAAGGGATA
SK03_30480853	3	TGTTTATGGACCAGAAGCAATAATCC	AATTTGTTTATGGACCAGAAGCAATAATCT	ACATAACACCAATCCAGCTACACACAAAT
SK03_31050704	3	GTTTTCAATTCGCTTTTCTTTATAATGTAGAAT	TTCAATTCGCTTTTCTTTATAATGTAGAAC	GCCTTCAAGTTCACATATTCCTGATAGTT
SK03_31441266	3	GCGAGGTGAGGAAACGGCC	CGCGAGGTGAGGAAACGGCT	CACGAGCTCCACAGTGCGAGAA
SK03_33960369	3	GATGACAAAATATAAGGTAAGATTGGCCA	GACAAAATATAAGGTAAGATTGGCCG	GTTATATGGCTAGCTTGTATGCTATCGAT
SK03_3655067	3	CGAAACCGCTGCGCGAAGC	CCGAAACCGCTGCGCGAAGT	ACACCGTAGGGCCATTCAGGATAAT
SK03_3704047	3	GTAGACTGAACCCTTCATGAAGAG	GTAGACTGAACCCTTCATGAAGAA	TGGCATTGCATGAGCTTCCTCCAT
SK03_431667	3	GTTGACCTTGGAGTAGGGC	CTGTTGACCTTGGAGTAGGGG	CGGGAGCCATCTGGGACTTCAT
SK03_4409689	3	GGGTCATATGCAGTTTTCCTTTCATA	GGGTCATATGCAGTTTTCCTTTCATG	ATGTGGCTGCGGCCAATCAAACTTT
SK03_7440357	3	CATCCACAAAAACAACGACAGATATATTTTA	CATCCACAAAAACAACGACAGATATATTTTT	TACTGCCCATTTGACTTTTGCACGATTTT
SK03_9333643	3	CTTGAGTGCTAACATCAGTTA	GCTCTTGAGTGCTAACATCAGTTG	TGCTATTCCTATTCTTGTTAGCCTGCTAT
SK03_16075626	3	CATTCTTCTCAGGATCTCCTCCAT	CTTCTCAGGATCTCCTCCAC	TTCAAGAGAAAGTCAACGAGGCATCAA
SK03_16708131	3	CAACACCAAGCATGTTGTTAGGTCA	AACACCAAGCATGTTGTTAGGTCG	GAGGACGGTGAGCGAGAGCTAA
SK03_17092696	3	GTTAATAATATTTTTGGGTCTCGGCACAT	AATAATATTTTTGGGTCTCGGCACAG	GGTCGCTTTGCTGCGCATACATAA
SK03_28852757	3	CGGCAGCACGCTCATCGCT	GGCAGCACGCTCATCGCC	CGGGAGAACGGCGGCGGAT
SK03_872082	3	GAAGAACACGCATGAAGGATCATCT	AAGAACACGCATGAAGGATCATCC	GGAGAGGCCCAATGAACTTGACTTT
SK03_21258737	3	ATCTAGTCAAGGCTTAGCCCCTT	CTAGTCAAGGCTTAGCCCCTG	GTCTTACATAAATGCAGCGGAAAAACAAAA
SK04_13225981	4	GCCGGTGCTAACCATTTAG	GCTGCCGGTGCTAACCATTTAC	CTCGCGCCAATATAAGGAAACGATTTAAA
SK04_20396474	4	ATGAAGATGGACCTGCCACTCTA	GAAGATGGACCTGCCACTCTG	TACTATCCTCTCTTCTTTCCTTGCTCTT
SK04_22435296	4	ATGGATGCCTGACTGGCTGACT	GGATGCCTGACTGGCTGACC	CTCTGTATTTCGTGTGATAAAAGAGCAAAT
SK04_27800401	4	AGCGCTACTCTACGTTTGAGGAT	GCGCTACTCTACGTTTGAGGAC	GTGAACCATAATGGAACTTTGGGATGATT
SK04_31904771	4	GTTTTGATCAACGAGTCAACTTTATGCA	TTGATCAACGAGTCAACTTTATGCG	CCGTCCATTTCCCCTGGACGAA
SK04_4457978	4	ATAGATTTCAGTAACAGTTAATTGAGTGCA	TCAGTAACAGTTAATTGAGTGCC	TAATGTGGAATTGAATGGCGATGCACAAT
SK04_14094091	4	GCATTTGAATCTACTTTCAAGCAAACG	CAGCATTTGAATCTACTTTCAAGCAAACA	GAATTCACAGGAATTATCTTGACATGTGAT
SK04_21815986	4	GAAGACCGAAGACTTTCTGAGGT	GAAGACCGAAGACTTTCTGAGGC	CTCCGTCTCCACCACCATGGAT
SK04_31373467	4	CACTTGATCAGTGTCTGAACTCTG	CACTTGATCAGTGTCTGAACTCTC	TGGAGAGCACATCGGTTCAGACTT
SK04_33868056	4	ACATGTGAGCCCGAGGATCTG	GACATGTGAGCCCGAGGATCTA	CCTCTGCTGTAGTACTGCTCACTAA
SK04_7428150	4	ATGATAGAGAAGTGCAGTGCCATTG	ATGATAGAGAAGTGCAGTGCCATTC	GGTTGTGTCCTGGTTCCAGTATTATATTT
SK04_13743580	4	AAAGGCGCTTGGCTCAGTGGT	AGGCGCTTGGCTCAGTGGC	CCGATTGGGTGAAGATGGAAGCATT
SK04_18342721	4	CCAAGTGAAAGATGCCTGGATAACAA	CAAGTGAAAGATGCCTGGATAACAG	GTTTGGCCACAGCCTCATCCATATT
SK04_18754459	4	ATTTTACATGTTTTAAACCTGAATGAATTGAC	ATTTTACATGTTTTAAACCTGAATGAATTGAT	CCGGGGCGATGTCAATGCACTA
SK04_33626126	4	GTAATGCCCAAACACTACATTTCTATGT	AATGCCCAAACACTACATTTCTATGC	CAAGCTATTTCAGGGAACTGCATAACATT
SK04_4411950	4	ACCAAGAAGGTTCTAAAGCACACAG	AACCAAGAAGGTTCTAAAGCACACAA	ACTCTGTTTTCTAATTTAACTGCATCGCTA
SK04_4414154	4	CAAAACAAATTTAAATTCAACCAGTGGTC	CCAAAACAAATTTAAATTCAACCAGTGGTA	TTGCTACATATGCTGATCACATACAGGTT
SK04_4559723	4	TAAAATCCTATCCTATTCAGATCTAGAAA	AAAATCCTATCCTATTCAGATCTAGAAC	GGCTGTGGCCAGGGTTTGCAT
SK04_4599886	4	GTTCGATAAATTTATACGGGCAAAATATCAA	CGATAAATTTATACGGGCAAAATATCAG	CTTTTAAAGCGTGGCAGGTGCCATA
SK04_4647693	4	GCCAAGACGAACACGTGAGCA	GCCAAGACGAACACGTGAGCG	GATAGAACTTGGAGCCACAATAAAACCAA
SK04_19835234	4	ATGTATAATTATGTACAATAATTAATCGTGGAG	ATGTATAATTATGTACAATAATTAATCGTGGAT	CAGCCAAGATACTCTACAGTTTATGAGTT
SK04_20426399	4	CAGTAACCCGTTCGGACGAGG	ACAGTAACCCGTTCGGACGAGA	TACCTATCTGATAGGTACCTCATAGGTAT
SK04_23467371	4	GAAAATATTTCAAGAACTGAAGAATGCACT	AAAATATTTCAAGAACTGAAGAATGCACC	TGGCTCATTGATAGGTACTACTAGCTAAT
SK04_24949703	4	GATGAATAATAATAGCCATGGATTAACCG	GATGAATAATAATAGCCATGGATTAACCA	GTTCCCTCTGTTGATTATGTCTGATGTAA
SK04_26907634	4	CCCTTCTGCAGAATCTGGC	CCTCCCTTCTGCAGAATCTGGT	CATTGCAGGCCGATGTGTGCCAT
SK04_27567935	4	CGCGGACGAAGACGCCACA	GCGGACGAAGACGCCACG	GTGCACCGCCACCACGTTCTA
SK04_32843112	4	AGTAAAATGTTTAAAGTCTCAGCAATAGCT	AGTAAAATGTTTAAAGTCTCAGCAATAGCA	TGTTATTGCAGCTGTTGATGACATGCAAA
SK04_10396788	4	GGACGATTGATGGGGTGTTGCTT	GACGATTGATGGGGTGTTGCTC	ACCTTAGCCTGATTAGTACTCAAACACTT
SK04_11748452	4	ATTCAACATATTTCCGTCACGGATGAT	CAACATATTTCCGTCACGGATGAC	CGCTCGACGGACGCCGCTT
SK04_12550310	4	GATTGCCCGGAGAAGAGAAAAAGTT	GCCCGGAGAAGAGAAAAAGTG	CTCTTTTCCCCCTCCCCTTCCTT
SK04_16935377	4	AATCCGAATTTTAGGCCCACAATATATTT	CCGAATTTTAGGCCCACAATATATTC	CACCTAATAGAAAAAGACGTAGAGTCCTA
SK04_25898378	4	GCACCCTAGGCATGTTTGGATAT	GCACCCTAGGCATGTTTGGATAG	ATGCCAAAGAGATAAGGCACTATACTCAT
SK04_34683717	4	GAATAATTATTCTGCAGGAATTCATTGCG	GAATAATTATTCTGCAGGAATTCATTGCA	CTCAATTTGCAACTCTCTAAGTGGTTGTT
SK04_6057384	4	TAGTAAGCTAAGCTGGCCTCTC	CTTAGTAAGCTAAGCTGGCCTCTA	GCATTTCTCTCTGTTTAGGACTTTAGACTT
SK04_8837857	4	AAATGAAATTCTCGATGCCAATTGCAAAA	ATGAAATTCTCGATGCCAATTGCAAAC	GAACCAGAATCAGTTGGCATAGAAACAA
SK05_15556017	5	GAGGTCATGTATGTGGTCCGGT	AGGTCATGTATGTGGTCCGGC	GTGAAAGGTTTGGTGGCCAGCGAA
SK05_2736952	5	GAAGAGCCTCATGAAACAATCCATAT	GAAGAGCCTCATGAAACAATCCATAC	TACTGCTCTGATAATTATACTTGTGGCAAA
SK05_29497783	5	CCACAGGAACCATGGTAAGCTG	CCACAGGAACCATGGTAAGCTC	CAAGTTCACATCACATGTTGCTTACCTAT
SK05_593158	5	GCACTACCGTCATTTCGCAACG	GCACTACCGTCATTTCGCAACC	GGGAAACGGACGGAGAGAGAAATTT
SK05_7411452	5	AGTTTTTAATAACTCTTGAAGATGAAGATGTTA	GTTTTTAATAACTCTTGAAGATGAAGATGTTG	CCGTTAGGACGAGATTTGGTCCATT
SK05_13046184	5	AGCAATGCTGTCAGGAGCAT	GCTAGCAATGCTGTCAGGAGCAA	AACTGTGGTCTCACCTAACATAATGCAAA
SK05_16262586	5	GAAGTATAGAGATGACAATTCTTGAACATT	AAGTATAGAGATGACAATTCTTGAACATG	AGGGATAAGTTAGTACCAAGGTGCTAAA
SK05_20493787	5	CAAAGTAGCTCGACGTCTCACTC	CAAAGTAGCTCGACGTCTCACTT	TTTCGTATAATTTGGACGGAGAATGAGTTT
SK05_2570081	5	AAATGTTGAGTAAATTGGTCTTGAGGTTA	ATGTTGAGTAAATTGGTCTTGAGGTTG	CAGTAGAAATTGTTTGGATCATAGTAGCAT
SK05_26260986	5	CACTTTGAGCAGGACCAAG	GGCTCACTTTGAGCAGGACCAAA	ACGCTTTCCTTGGCAACCCATCTTT
SK05_8385270	5	AGTCGAGTCCTACCAAGTTGCC	GAGTCGAGTCCTACCAAGTTGCT	CTGTTGATTTGCAATTGCACTCAGTGAT
SK05_21562338	5	CGACGAGGAGCGACATCATTGTT	GACGAGGAGCGACATCATTGTC	CATGGCTTCTCGAGCTAGCTCCTT
SK05_22543984	5	AGTTCCTCCTAGGTAATTCCCAA	CTAGTTCCTCCTAGGTAATTCCCAT	TCTCCAAGGTGGAACCTGAAATAAGAAA
SK05_24070572	5	GTACTAAATTTTAGTAGTGACAACTCATA	GTACTAAATTTTAGTAGTGACAACTCATC	CAAGTCCCAACCATATGCTCTGCAA
SK05_29017036	5	CGATGGCAACGTAGACGATCACT	GATGGCAACGTAGACGATCACC	GAGACTCAATCAAAGACTCGGTCCAT
SK05_4794565	5	AGTATTTAGACAAGGCCGGAGCTA	GTATTTAGACAAGGCCGGAGCTG	GCAAGCGAGTAGCACTTTGCCATTT
SK05_6707417	5	AGGACCAACACCGGTGGCTAT	GGACCAACACCGGTGGCTAC	CTACAACCATGAGACTGCCAATAGTTAAA
SK05_3340204	5	GATTCCAGACGGTGCCGTTTGTA	CCAGACGGTGCCGTTTGTT	ATTTTGTCACTGTCTTCTATCTCACCAAAA
SK05_5339085	5	GTGAAAAACAGATTCGCTGTGACAC	ATGTGAAAAACAGATTCGCTGTGACAT	CCACATCACTGCATCAGTTGTTATCTAAA
SK05_5341385	5	CGTTTCCCGTGGGCAGAGGT	CGTTTCCCGTGGGCAGAGGA	GGCGTTGCAAAGAGTGTTGCTTTGAA
SK05_5364311	5	GATTAGGATTGGACGCAGCGATA	AGGATTGGACGCAGCGATC	GTCTTTTTGGGCTTACACTGTCCCTT
SK05_5425895	5	AGGATCTTTTAAATCTCGATGCATAATCT	GGATCTTTTAAATCTCGATGCATAATCC	GCCCAGAATGATGCCAGAGGCTT
SK05_5427770	5	AAGCAATAAATTGTATTTTTTAGCATTTTCCAC	AAGCAATAAATTGTATTTTTTAGCATTTTCCAG	GTTCCTGGCTAAAATCCATGATTCCATTA
SK05_5441846	5	TAGCAATTTGTAGCAGGAGAGAG	AACTTAGCAATTTGTAGCAGGAGAGAA	CCAAACATATGCGAAGGTCAGAGCTT
SK05_5445097	5	CCAACACATAACAAGTGAGGTCCTT	CAACACATAACAAGTGAGGTCCTC	GCTAAGGACAAAGGTTTCTTAAGGACAAA
SK05_5537852	5	TACACAGTAAAACGCATGCGCTCA	CACAGTAAAACGCATGCGCTCG	GTGTATTTATAGGATGAGTTGAGTACGTTA
SK05_1351848	5	AACCCCAACTACATGACTAGCTAC	CAACCCCAACTACATGACTAGCTAT	GCAGCTTTGTGGAGGGGGAAGTA
SK05_16512716	5	GGGCATTGAGCATGTCCTACAC	ATGGGCATTGAGCATGTCCTACAT	CCCGCTACAGCACACACCAAGAA
SK05_23733220	5	AGCTAGATCTCTGTACTCTATCC	GCTAGCTAGATCTCTGTACTCTATCT	CTACGAATCTGGATAACTATCTATCTGGAT
SK05_27742506	5	AGAGAAACAGACCATGGAGCTGATA	AGAGAAACAGACCATGGAGCTGATT	ATGGCATTTTCTGAAGCTAATGTTGGCTT
SK05_3207628	5	TGATGATTCTTCATTGGCCCCT	GATGATTCTTCATTGGCCCCC	GAGAGGAAATGCAGCCCGGAGTA
SK05_4195403	5	GCCATCAAAAGTCCAAAGGTCCT	GCCATCAAAAGTCCAAAGGTCCA	TGGCAATGGTTATCCCCTACCCTT
SK05_990754	5	GTTAATTTCTTCTTCCATAATAAATCATGTGT	GTTAATTTCTTCTTCCATAATAAATCATGTGA	AGCCCAAATTAGAGACAGAATCAAGTCAT
SK05_4984766	5	GTTGATCAGGTCCACCGCCAG	GTTGATCAGGTCCACCGCCAC	TCCAAACCTCCTTGAAGCGCCTAAA
SK05_5396755	5	GAGCTAATTTCTGAATCGACAATGAC	GAGCTAATTTCTGAATCGACAATGAG	GAAACAAACTAACACAATTGCAAAGCCTTT
SK05_14301919	5	CGATTAAGAACTTGAAGTGTCTTA	GCTCGATTAAGAACTTGAAGTGTCTTT	TTGAAACCTTTGGTTGGCACAGAACTT
SK05_17830875	5	TTAGCAACTTGCATGCTGCATCCT	AGCAACTTGCATGCTGCATCCC	GCATAATTTATTCAGGCAACAATCTGCAAT
SK05_19160084	5	CACCGCGATCATTCCCTCGTAAT	ACCGCGATCATTCCCTCGTAAC	TCGCGACGCCGCCGTCGTT
SK05_25215570	5	AAAGGCGGAAAACAGTTGATCATCG	AAAGGCGGAAAACAGTTGATCATCA	GCAGCAATGAATGCTGTAAGTCCCTT
SK05_9214505	5	AAAATAAACTTATCCCTTCCATCCAAT	CTAAAATAAACTTATCCCTTCCATCCAAC	GCCTGACAAATCCAGCTCACAGATT
SK06_15538142	6	CCTGATTTGTGGAGGAACGACGT	CTGATTTGTGGAGGAACGACGC	ATCTAGAGAAACTTGCGAGAAGAGTCAAA
SK06_27627615	6	ACATGTCGGTGTCAGAGGATGAT	CATGTCGGTGTCAGAGGATGAG	CACGGCAGGAGGAGCACACAT
SK06_29208264	6	GTCATAAGTGTCATCTGTGGATGCTT	CATAAGTGTCATCTGTGGATGCTG	CCCCGACAAGTTACAATGTTCAGCTA
SK06_4022325	6	GCATTTGAGACGCTCACTGGAAG	GCATTTGAGACGCTCACTGGAAC	GTGGAGTAGCGATGCCTTCCGTA
SK06_12191074	6	AGCAACCCCGTTGACTTTTGAAGA	AGCAACCCCGTTGACTTTTGAAGT	AATACCGGTTCTCAATGAAAAGTCAGCTA
SK06_16614854	6	CTTTGGGATCTGTTGGAAATCTCG	CTTTGGGATCTGTTGGAAATCTCC	TTTGAATTTGAGCCATGGAGCATGCAA
SK06_1975737	6	GAATTAACTGCGGTTGCATTTGCG	ATGAATTAACTGCGGTTGCATTTGCA	CTACAATCTTTTCCTGATTTGCCTCTGAA
SK06_20950922	6	CCTTATTTGATGAATAAGATCAGCCG	GCCTTATTTGATGAATAAGATCAGCCA	CTCAGGTCTGTCAAATCATTTGTTGGAAT
SK06_25033082	6	AGGAAAGAAGCTGCCAGAGTCC	AAAGGAAAGAAGCTGCCAGAGTCA	ATTCGGAAGCATGACATAGCAAACAAGTA
SK06_30809492	6	AACTCAGGAAGGTTATCGTTGCCTA	CTCAGGAAGGTTATCGTTGCCTG	CACCAACTATTCAGAATATCGCAAGAATTT
SK06_7003213	6	AGTATAATTTTCTGTACAAATTGAGCGGT	GTATAATTTTCTGTACAAATTGAGCGGC	GAAATGGAACCAACCCATATAGTTCTATTT
SK06_2099853	6	ACTAGCAGCTTGTGTATCAACTCCA	AGCAGCTTGTGTATCAACTCCG	TCCTGAGAAAAGAGACAATGTAATGAAGAA
SK06_22670232	6	CTTTGCTACTAGCTTAGTGGCGAA	CTTTGCTACTAGCTTAGTGGCGAT	GTCTCTTAAGATCCCGGAGGATACAA
SK06_5612809	6	GCAACCGAGCCTTAGCTATAGCT	CAACCGAGCCTTAGCTATAGCC	AGTTGGTCGCACGTCAGCAAAACTA
SK06_6478676	6	GACTATGCTGCTGTATCCAGCGT	ACTATGCTGCTGTATCCAGCGG	CTTTCAATCTGAATCTGGTGGGTATCTTT
SK06_10389729	6	CAAGTGTTCCAATAATACCTGAGAT	CTCAAGTGTTCCAATAATACCTGAGAA	TTCCCTCCAATCTCTCCATGTGGAT
SK06_1765761	6	TCATCAGGAAGAACATCTGCAAGG	GTTCATCAGGAAGAACATCTGCAAGT	CGATCTGAATAAGAGGGGAAACAAAGAAT
SK06_1768006	6	CAACAACCCATACTTCAAAGGAACTTA	AACAACCCATACTTCAAAGGAACTTC	GATCATCATGGATTCCTTCGAAGAAAGTT
SK06_1768997	6	GGCGGCCATGACGTCAGG	CGGCGGCCATGACGTCAGA	TCGGCAGGCTGGAGGAACAGAA
SK06_6752756	6	GAACGGGTCGAACGCCGACAT	ACGGGTCGAACGCCGACAC	GTCGGCGGGCTGAGGGACA
SK06_6752887	6	GACATGCCGCGCACCTGGAA	ACATGCCGCGCACCTGGAG	GCCTCGAGACGTACCGCAAGTA
SK06_1349980	6	TTGAGGTTGCGAATCTTGACAGCT	TGAGGTTGCGAATCTTGACAGCA	GACAAATCTCAAAGATCGCCACCGAA
SK06_1372731	6	GACATTTGGTTCTATTGTATCGTGTGAT	ACATTTGGTTCTATTGTATCGTGTGAC	CACCTGTCATGTTTGGAGAAGTTTGTAA
SK06_1509884	6	GAGGATCAGTCAACAATGCCTTG	ACGAGGATCAGTCAACAATGCCTTA	GGCATCAAGAAGAAGAAAAAGAAACTGGAA
SK06_1529726	6	ACAAATGTCATTAGAGAATAAATACAAGCG	ATACAAATGTCATTAGAGAATAAATACAAGCA	CTATTGTAGATGTCTCATTTTCGCATTTAT
SK06_1586456	6	GAACTGTCATCCACGAGATCTTCAAA	AACTGTCATCCACGAGATCTTCAAG	GTAGTATTTGGTTGCAAAGTCTCACTGAA
SK06_1587473	6	AAGGGAAAATGGAGGAAATATCGGG	AAGGGAAAATGGAGGAAATATCGGC	TTGCTAACCAAATCCAAGGATGAAAGCAA
SK06_1594975	6	GTAATCCAGGGCGAACTTTTGTA	CTGTAATCCAGGGCGAACTTTTGTT	CTAGTGTTCATTCCTTCACAGAAGTACAT
SK06_27326725	6	GATGGTGACATTGGTGACGAGC	AGATGGTGACATTGGTGACGAGT	GGTGAGGGCTCTAGCGACACTA
SK06_27368248	6	GGTATGTTGTCTATGAAATTTGCAG	ACTGGTATGTTGTCTATGAAATTTGCAA	GCTAAATTTGACTTGCTGCAGTTTGACTT
SK06_27438624	6	AACTAATTTGTTCTTAATTATCATTCTTGGC	GTAACTAATTTGTTCTTAATTATCATTCTTGGA	CAGAGGTTGGTTGGCACATCTCTTT
SK06_27498819	6	ATAATTTTCGAGTAGCCTGCAGCC	CATAATTTTCGAGTAGCCTGCAGCT	TGTATAACTTACCAGTACAGACCATATCAA
SK06_27526542	6	GAATCTTTGCCTAACTTCAGCTCGT	GAATCTTTGCCTAACTTCAGCTCGA	ATGATGAATCTTGGTGATGATGATGATGAT
SK06_27526729	6	AAAGACACGATATTTGGTTTGTTCAGC	GTAAAGACACGATATTTGGTTTGTTCAGT	GATAATACGGTTTTGTAAATCCCAGGTTTT
SK06_28796789	6	GCATTACGAATACGTAACAATTTGACAC	AGCATTACGAATACGTAACAATTTGACAT	TTGAAGTTGCAAAAGTAGTTCACGTGCTT
SK06_28800531	6	TCTTTATAACAACTCATTTTGCAACGAATTTT	CTTTATAACAACTCATTTTGCAACGAATTTC	CCCATTTTACATTTCTTTTCGTTGCATCAA
SK06_28871380	6	CAGAATACAATATCTTCTGGATAACCG	CCAGAATACAATATCTTCTGGATAACCA	TTCGTCGACGTCACGCAACTGTTTA
SK06_28873249	6	CATTAGGGATAGCTCCAGC	AGCTCATTAGGGATAGCTCCAGT	TGCTCAAGGATGGACACACAACGTT
SK06_28879041	6	TAAACTAGTCGTAATTAGCTGCCC	CTTAAACTAGTCGTAATTAGCTGCCA	AACCGAAGGAAGAGTGGGTTGACTT
SK06_28999672	6	CATTCGCATCAACCAACGTCACAATT	CGCATCAACCAACGTCACAATC	AGACCAAGAAAAAGAGGAAGAAGAAGCTA
SK06_29000232	6	ATGGTACGGAGTACGTACATATACG	GATGGTACGGAGTACGTACATATACA	GAACCCACCCTATTTGTATGGACGTT
SK06_382564	6	ACGCACAAATAACCACTGCCAAAT	ACGCACAAATAACCACTGCCAAAC	GGACATTAGTGTTTTCATCCCGCAGAT
SK06_395890	6	GATTACCTGGAGCACCGTGTAG	ACCTGGAGCACCGTGTAC	GCTTCTACCTTTTCCTGGCAGTAGTT
SK06_454048	6	CAATCTTGAAGGAAATCATGTCCACC	CAATCTTGAAGGAAATCATGTCCACT	CCACGCAAGCAAGGATAATTGGCAA
SK06_4737177	6	ATACTAACCATCTTCCTCTGTAGCAT	ACTAACCATCTTCCTCTGTAGCAC	TCGTACTAATTGCTATTGCAGGACAACAA
SK06_4795998	6	GCCAGAACCATCCAAGAGCAGTT	GCCAGAACCATCCAAGAGCAGTA	CATGGGAATTATCGAGCTCTCGCTT
SK06_4870556	6	TTTGTTTTGCCGCCCTAGAGTGT	TTGTTTTGCCGCCCTAGAGTGA	CTGAATCAAACAAAGACAATGCGTTCCTA
SK06_4892296	6	AATCTGAAAGAATTCCTCTTCATGTTCA	ATCTGAAAGAATTCCTCTTCATGTTCG	GGGATAATCGGTGCTGATCCTTTGTT
SK06_4930358	6	GGTTTAAAGGAGCTTGCTGCGAT	GGTTTAAAGGAGCTTGCTGCGAC	GTCTGATTCTATTGGTCAACTCAAGCAAT
SK06_638510	6	ATATGATTGTTCAAACCAAGAAGACAATATTAT	GATTGTTCAAACCAAGAAGACAATATTAC	TTTGGATGGTATACAGTATACACCTAGTTT
SK06_647869	6	AGCATAGAAGAAACAGTGAACCAGC	ATAGCATAGAAGAAACAGTGAACCAGA	GAGAAAGGTAACGTCACTGCACCTT
SK06_662221	6	GATCCCTTGTATGGAACCAGCG	ATGATCCCTTGTATGGAACCAGCA	CTCAGTGAAATCAAGAGGTCTGCCTT
SK06_701439	6	AGTATAGTGCAACCAGTGTCCCT	AGTATAGTGCAACCAGTGTCCCA	TCAGCCTTATGGACAACATTGTTGTCTT
SK06_10388662	6	CCTCAGGAAAGATACTTAGATACAAAAAG	CCTCAGGAAAGATACTTAGATACAAAAAA	CACCTACCATCCCATCTGAAACCAT
SK06_13056699	6	AGGGACTTCCTCTTCATCACATAA	AGGGACTTCCTCTTCATCACATAC	CTTCCTTTATTGCTCCATGTTTCCTGAAA
SK06_1471478	6	GACGCAGGCGAAGGCGACT	ACGCAGGCGAAGGCGACG	TCGACGGCGGCGAGCGCTT
SK06_17163218	6	ATTCTGCCTATGGTCTGATATTTCTCT	CTGCCTATGGTCTGATATTTCTCA	CACAGAATGAAGATTGTTAGAAGCTCTGTT
SK06_1962294	6	ACAAAGTAATTAATTAATTAACATCAACACTAG	ACAAAGTAATTAATTAATTAACATCAACACTAA	GCAGCTAAGGATGGTTGGATGGTTA
SK06_23854416	6	TGCCACTACTGTTCTCAAGTTGTG	GCCACTACTGTTCTCAAGTTGTC	GGTGGGTTGAAAAACCTTGACGTCTA
SK06_25203744	6	AAGGGGAAAAAAGAGAAAGAAACTCG	GAAGGGGAAAAAAGAGAAAGAAACTCA	CATGGAGGTTAGTGTAGTAATTCATCGTT
SK06_27481339	6	GCCGCTGGTGGACCGCG	AGCCGCTGGTGGACCGCA	GTCGGGAGGCACGCCAGGA
SK06_2781588	6	ACCTCCGCAAGCTCGTGGC	CAACCTCCGCAAGCTCGTGGT	AATCGCTGAACCGTGGGTTGAACAA
SK06_28109159	6	AAACAGATGAACTCAGCATCCAAAAAAAAA	AAACAGATGAACTCAGCATCCAAAAAAAAT	CGCCAAAATTAACTACTAGCTTTGGGTTT
SK06_30176430	6	TCTTGTAGGTTTCAGTCTGTGTGG	CTTGTAGGTTTCAGTCTGTGTGC	TCGGTTTTAATTTCTGCAGTATCATGTGAT
SK06_6749313	6	AGACAAGCCGCAGCCGGAG	GTAGACAAGCCGCAGCCGGAT	CGTCGCGTCTGGGATGACGAA
SK06_9338330	6	CCACTGCAGCTCTATCTGACG	CTCCACTGCAGCTCTATCTGACA	CCATCAGAACCATGGAACAGTACCAT
SK06_14939243	6	TCAAAAGTTGATAGATGATGGGGTAATTT	CAAAAGTTGATAGATGATGGGGTAATTG	ATCTTCAAACTTTTGAGGAGATCCGCAT
SK06_16417487	6	AAGGATATCCATTCAGCAAACTCCG	CAAGGATATCCATTCAGCAAACTCCA	AAGCAACCTCCGCAGCGAGCTT
SK06_22155057	6	CAATTTTGCGAGGTCCAGCACG	GCAATTTTGCGAGGTCCAGCACA	GGACATACCTCCTTCTAGCATCCTT
SK06_22952048	6	CAGGAGAAATCCCAGAATCATTGGT	AGGAGAAATCCCAGAATCATTGGC	CATGAGCACAAGAACCTGCAACGAT
SK06_3590969	6	CATAGGTGCACGACTATTGTAGCA	ATAGGTGCACGACTATTGTAGCG	CATGACAAGCTGTATGGTGGCTAGTA
SK06_4212402	6	GGAAACCTTCACTGGTCGGCAA	GAAACCTTCACTGGTCGGCAG	GCTCCAATTTTGAAACCGAAGTAGTGAAA
SK06_4637190	6	AATTTTAAGATATATCGGATCGGCTTATCA	TAAGATATATCGGATCGGCTTATCG	CATGTGCATACACCCTGATCCCTAT
SK06_5036025	6	TGCCATTTCTTGCTGATGATTGATGA	GCCATTTCTTGCTGATGATTGATGC	CATGGTCTAACTCGTTCTATTAGAAATGTT
SK06_5874707	6	CAACTGTGCTGGTCAGTGGCAA	AACTGTGCTGGTCAGTGGCAG	GCCTTTTAATTGGATCAATGCGTGGAAAA
SK06_7019948	6	GCAAACTGCGATTCTGAATCCCA	GCAAACTGCGATTCTGAATCCCG	GATGGAGGGAATGTTCTTCTGCCAA
SK06_7670859	6	AACATTTTGTGTCACGGCATCG	GCTAACATTTTGTGTCACGGCATCA	ACTGGTGCATTAAGGACGCTCCAAA
SK06_873670	6	GCAAACCAGGTTTGGCTTGGTA	GCAAACCAGGTTTGGCTTGGTG	CACTCTGCGAAGGCTCTCGAGAT
SK06_9652784	6	GTACGGAGGTGATTAAACCGACAT	ACGGAGGTGATTAAACCGACAG	CCTCCGGTCTGAATGCTGCCTT
SK06_11287473	6	GTCAAGAGATAGAAGTGCTTGCTCAA	CAAGAGATAGAAGTGCTTGCTCAC	CAAACCAAGTGGTCTTTTCACTAACTCAA
SK06_19665735	6	GTCTTGTATGTGCACTGCTACTTCT	CTTGTATGTGCACTGCTACTTCC	CTAATGCTCCAATAGAGCAGGCAATAATA
SK06_26266828	6	GTCCATATGCAGGTGACTCAAATTGT	CCATATGCAGGTGACTCAAATTGC	GACATGTTAATCAAGTGAAGAGCAAGCAA
SK07_1867588	7	GGGTGAAGTACTAGCAAGTAGCT	GGGTGAAGTACTAGCAAGTAGCC	GACTCCCATCGCCATCGCTTGAT
SK07_21280092	7	CAGCAAGTATGCAATGCAAATGCACT	AGCAAGTATGCAATGCAAATGCACC	AACTTTGATGAGGAAACGCCTTGAACAAT
SK07_25319809	7	CAACTTCAGCTCTGGCATTACAA	CAACTTCAGCTCTGGCATTACAC	GGCAGTTTTACTTGTGGACTAAGGGAT
SK07_28197301	7	CGTTTGACATGGTTGCCGAGACA	GTTTGACATGGTTGCCGAGACG	CTAGAGGCGGCATCATTTCCTTGAA
SK07_13776155	7	TAATGTTAATTTTCTACCCTGTCAGGTT	AATGTTAATTTTCTACCCTGTCAGGTC	GTTATAGCTCCAGCAGGTGCTTTGAA
SK07_18503646	7	CATCAGACGGTTCCTGGCG	ACTCATCAGACGGTTCCTGGCA	CGGTGGGCTCGGGTTGCTTATT
SK07_22593213	7	ACATACAGAACTTATAGGGATTAACAAGT	CATACAGAACTTATAGGGATTAACAAGC	CTGCTGCACGAGAATTCAAGGCAAT
SK07_5973717	7	AGTATATAATAGATAAAGATTTGGCAGATTGT	AGTATATAATAGATAAAGATTTGGCAGATTGA	CACCTGTAGATAGACATAACAGTTACATTA
SK07_18927936	7	GTGTAACACTCAAACGCACACAAC	GTGTAACACTCAAACGCACACAAG	CCAAACAGTTGTATCATACACCATGTCTA
SK07_24653396	7	CATGCCAACTAGTCAGCAAAAGCATT	ATGCCAACTAGTCAGCAAAAGCATC	AAAGTTCAGTCCCAGCCCTTCGTTT
SK07_26502762	7	AGTGCTTGCAAAAGGTTACCGGA	GTGCTTGCAAAAGGTTACCGGG	GGACGTACAAGAGCTAAGATAACTTGTT
SK07_6991402	7	ATCCCATCAGCACACAGTATTTGCA	CCCATCAGCACACAGTATTTGCG	ATGGGTAGACTTCATCATGAAATCCCAA
SK07_25365395	7	AGGTAACAACCTTATAAACGGAGATCT	GGTAACAACCTTATAAACGGAGATCC	CAAGACCGGAAACTCAAAGGTATAATGTT
SK07_25381724	7	TTTCTCACTGTCACAGAGCACCA	TTCTCACTGTCACAGAGCACCT	CTGGAAGATGAGCTGCTTGGTTTGTT
SK07_3431101	7	GGATTTGATCCTTGCTGCAGCTAAT	TGATCCTTGCTGCAGCTAAG	CTCTAGATATCTTGGAAAGGTCATGAGAA
SK07_472805	7	CACAAACATATTGTTCTAGTTAGTCCG	AAACACAAACATATTGTTCTAGTTAGTCCA	AGCACATTCTGGAGTACAATTACCAAATAT
SK07_22057564	7	AAGCACTAATACTAGGCTGCACAATAA	GCACTAATACTAGGCTGCACAATAG	GGGTACGTATTTCTTGGCATTACCATTTT
SK07_24845026	7	TAGCACGCACCGTAAAGTCC	GCTTAGCACGCACCGTAAAGTCT	CCTTTCTTTGACTTGTTGACTGGTCAAAT
SK07_26611324	7	AACGCATTGACTATTCCACACCG	AACGCATTGACTATTCCACACCC	CGAGGTGCAACTCCGTCTCCAT
SK07_16957375	7	GGGACTCCAATGACAGCAGTATT	GGGACTCCAATGACAGCAGTATC	TTGCCCTCTTGGTTTTCATTTCCATCTT
SK07_8546130	7	CACTTGGTATAAGGCCTAAACCTGT	ACTTGGTATAAGGCCTAAACCTGC	GTCTAAAAGTGGATAGATTGTAGGGACAA
SK08_20391635	8	GGACCATCGAGGAGCTAGGTAA	GACCATCGAGGAGCTAGGTAG	ACGCAGCTTGACAATGCCCAATCTT
SK08_9203557	8	TCTTGTTCCATTTGTAACAATTACCAACT	CTTGTTCCATTTGTAACAATTACCAACG	GAATTTCCTTTTTGTCCATGCATGGTCAA
SK08_10358484	8	GCGTGTTTTATAGCCTCGCGCA	CGTGTTTTATAGCCTCGCGCG	CTGCGCGGGAGAGAGCGCAT
SK08_17179846	8	CCCTAGGCCTGAACCTGACCT	CCCTAGGCCTGAACCTGACCA	GACACAAAGTGAACTTATTCCTCAGGAAA
SK08_24125399	8	AAGAGGGCTGTTGAGCTGT	CTAAGAGGGCTGTTGAGCTGC	CACTGGAGATCAGAGCAGTCTCATA
SK08_4557652	8	AGCTGGCAGATCACTCCATTTGA	GCTGGCAGATCACTCCATTTGC	GAGCTATAAAACATTGTTCAAGCCATCATA
SK08_15752022	8	CACTACGTTGCCCGTTTTGCG	GCACTACGTTGCCCGTTTTGCA	AACAAGCCTTACAGATGTTCAAAAGGAATT
SK08_17721768	8	CTGCATATTCAGACAAATGTGGA	CTCTGCATATTCAGACAAATGTGGG	CATCTGCATAAGCAGTGTTGATCCTTAAT
SK08_25456191	8	TTGCATTGCTTTCTCTTCTGCGAAT	GCATTGCTTTCTCTTCTGCGAAC	CAGTGTCATGATTAATGTATAACCTTGCAT
SK08_26326397	8	GAAGTACTACGTCCTATTGGTCCAAA	AAGTACTACGTCCTATTGGTCCAAC	CAGTAGGACATATGAAAGCATAGTCACAA
SK08_27805960	8	TTGGATTTCCAAGGTACAATCTTT	CTTTGGATTTCCAAGGTACAATCTTC	GTTCATCGTTGGTATTTGCTTTGGGAAAA
SK08_5136182	8	GCCAGCAAAGACTGGGTAAATTCT	CCAGCAAAGACTGGGTAAATTCC	GCCAGTCTTTGCTGGCATGTATTGAT
SK08_5754369	8	CGTTTATTATTCGTGCAAACCAGGGA	CGTTTATTATTCGTGCAAACCAGGGT	AAGGAGCAAAAGGAGGATGTCATTGTTTT
SK08_730526	8	GTGTCCATGGAGATCATACAAGCAA	GTCCATGGAGATCATACAAGCAG	ACCTCCAGCTACCGATCGATGTTT
SK08_927616	8	GATGATCACATATGTACGTCCTTTTTTTT	GATGATCACATATGTACGTCCTTTTTTTA	CACCATGCCAGAGACAGCACAATAA
SK08_20382857	8	TAACCATAGGAGCAGCTGAAG	ACCTTAACCATAGGAGCAGCTGAAA	TGCATTTACTGGGAGTTATGAAACTGGTA
SK08_5140824	8	GGTGCAAGGTAGAGTGGTCTGAA	GTGCAAGGTAGAGTGGTCTGAG	TCTCAAACCATCCAAATTTGTGGTCTCTT
SK08_8008549	8	CGAGACACGGCTCAACTACGTTT	GAGACACGGCTCAACTACGTTG	GGCCCGAGCTACCCTGTCAATT
SK08_25208014	8	CATAGTACCTTTAATTTTCACAAGAAGTCA	ATAGTACCTTTAATTTTCACAAGAAGTCG	CTACCAAAAAGCCTAGCGCCGGAT
SK08_25320080	8	TGTTAAATTAAGCTCACATGTGCAATAT	GTTAAATTAAGCTCACATGTGCAATAC	CGCAGTTGATCATTCTCGGCCAAAA
SK08_25343868	8	TTTGGCATCTCTGCAAGAAATTGTTTAAA	GGCATCTCTGCAAGAAATTGTTTAAC	ACAGAAGCTGTTAATGCCTACTTGTGTTT
SK08_21582840	8	ATCACCATTTGATGCTCTGCTCTG	CATCACCATTTGATGCTCTGCTCTT	CTTGGGAGAAATGGAGGAGGAAGAA
SK08_25275885	8	GATAATAAGCATATAAAAGTTGCTTGCATTG	GGATAATAAGCATATAAAAGTTGCTTGCATTA	CTCCTACATGAATCAAGGTAAAACAAGCAA
SK08_26503563	8	ATATCTCCATCTATGACCAATCTTGAG	GAATATCTCCATCTATGACCAATCTTGAT	GTCTTCTAACCTTGCTGTTTTCTGAACAA
SK08_26728254	8	ATCAATGGAGACAGAAAGCTCAAGAAT	CAATGGAGACAGAAAGCTCAAGAAC	CAGTGCAGCAGGGCAATGTTGTTAA
SK08_2890468	8	ATCCATACCTCCTATGACAGCTC	GTATCCATACCTCCTATGACAGCTT	TGGATGGATGTCAGAATAATCAAGGGAAT
SK08_4732019	8	ATGAGTGATTGCGACCGAGCAC	ATGAGTGATTGCGACCGAGCAG	GCTTTTGCAGCTACCGCTACTCTTT
SK08_11707115	8	CCAAGGAACTAAACATGACTGAGAC	GCCAAGGAACTAAACATGACTGAGAT	CCTGCAGTTCTGGAACCAATATTTGATTT
SK08_13057016	8	GACGCGAGAATGGCAACAGAACA	ACGCGAGAATGGCAACAGAACG	GTTGTTGACGTTGGTGAACTGAGCAT
SK08_14054517	8	TGAGTTCTGAAAAACAAACTACGATGAAT	GAGTTCTGAAAAACAAACTACGATGAAA	GAACTCCTGTTCATCTGCATCTTGATTT
SK08_14908464	8	AAAAAATATGGTATGCCTACTATCCATCT	AAAATATGGTATGCCTACTATCCATCC	CCTAACTAGCAGTGAAAAACGGACTAAAT
SK08_22845257	8	ATAGCATACGCGTGACAACCCAA	AGCATACGCGTGACAACCCAG	AAGTGGGCCCCACCACGTTTAAAAA
SK08_3702914	8	TGCCCTTGTTTAGTCCCCAG	CCTTGCCCTTGTTTAGTCCCCAA	CTCCATTGTCCAGAGATTCAATATGATGTA
SK08_7135930	8	ACTCCTGCGACCAAGTCAATTTCT	CTCCTGCGACCAAGTCAATTTCC	ATAAAAGAGCTGCCCCTCTCAGGAA
SK09_14727088	9	ATCCCAGTTTCTAGAACCATTGGCT	CCCAGTTTCTAGAACCATTGGCC	TCACCCCAGTGAAGCAACTCTCAA
SK09_15765355	9	GGAATAGGCAATGTCATAATGACGTTTA	GAATAGGCAATGTCATAATGACGTTTG	CGGTATAAGACATGATACCCTGTAAGTTT
SK09_21127955	9	GCCTTTCGGTGTCTGAACAGC	GCCTTTCGGTGTCTGAACAGG	GCCTGCATCATCGTTGATGATCCTT
SK09_3717701	9	AACTTCATCAAAATACCAGAAAATCAACCT	CTTCATCAAAATACCAGAAAATCAACCC	CTCCTCTGTCCATTTCTCGGAGTTT
SK09_14889045	9	CAAGTTAGTTGTAGCCAATCGGACA	AAGTTAGTTGTAGCCAATCGGACC	GCGTGTGGGCAGGAAGACAAGTT
SK09_21604405	9	CACATGTTGAATAAATTAGATGTTTAGGAATTT	ACATGTTGAATAAATTAGATGTTTAGGAATTC	CCCCTGTCGTCGTTTATTTTTCATTGAT
SK09_2360445	9	AGAACAAACATTACTTCCGGCTGATTT	GAACAAACATTACTTCCGGCTGATTC	AGTGATGCCATGAGGGAGAGAAGAA
SK09_6982338	9	TACGTGTACTTGTATTTGCCGCTC	TTACGTGTACTTGTATTTGCCGCTT	GGAGGCCAATAACACTAAGATGTCTTAAA
SK09_21240672	9	CGAGATGCGTCATGTGAAATTAATCT	CGAGATGCGTCATGTGAAATTAATCC	GTTGTGATTTCCAGCATTTTGCAACTCAA
SK09_9837388	9	TTGTTTTCCAAACATCTCAACCAACTAAA	GTTTTCCAAACATCTCAACCAACTAAG	CGGTGATGCTTTTAGTTGAGATGTTTCTT
SK09_1158812	9	GATGAGAGTCAATCTAGTCTCTCC	GGATGAGAGTCAATCTAGTCTCTCT	GGCTTCTTTTTTCTTGTTTATACGTCCCAA
SK09_13760690	9	ACTAGCTCCTTCCTTAGCTT	GCTACTAGCTCCTTCCTTAGCTC	CCGTGCACATATACGCTAGTATGACTA
SK09_16412063	9	CAACGAGGAGCCCAACCAAACA	AACGAGGAGCCCAACCAAACG	GGCGCCATGGCTGTACTACCTT
SK09_19709461	9	CGGGTAAGACGATTCCGATAGC	ATCGGGTAAGACGATTCCGATAGA	CCATAGTATTATCCTCTACGTTTTGCTAAA
SK09_18868484	9	ACTGCAGGTTGCGTTTTCATCAG	GACTGCAGGTTGCGTTTTCATCAT	CAAGTGTTGATGCAGCTCAATCAAACTTT
SK09_4793301	9	AATTTTCACGTGATTTTCACAGGACCA	TTCACGTGATTTTCACAGGACCG	CTCTACCACCATTTTGCCGTAAGAGTA
SK10_16892044	10	ATTCGAGATACACACTGCAATATGTGT	CGAGATACACACTGCAATATGTGA	CATGATCTGATTCAAACGCATCCTAAGTT
SK10_22041740	10	GACTATCATATTTATTTCTGTGTATGTCATGT	CTATCATATTTATTTCTGTGTATGTCATGC	CCTCAAAAGGGCATATAAAAGACTAGGTT
SK10_8905257	10	GTCTTTGGTCAAGGCGCATGCAA	CTTTGGTCAAGGCGCATGCAG	CCGAGCTTTTCGCCACTCTGTTTA
SK10_14086902	10	ACCTGAAGATCGACGCTCCCAT	CCTGAAGATCGACGCTCCCAC	CGCAGCAATTCATAGTCCTTGTACTTTAA
SK10_19618705	10	TGGAGAATTCGGATTTGGATTTCT	CTTGGAGAATTCGGATTTGGATTTCA	GCCATTAATGGGCTCTCCGTACAAA
SK10_23033344	10	GTCAAAAGCTGAGTGATTCCAGG	CTGTCAAAAGCTGAGTGATTCCAGA	GACATTGATGAATCTTGGGAATCCCTTA
SK10_6640908	10	GGAAACTCTGATCCGGAACGT	GGAAACTCTGATCCGGAACGC	GTAGATGGTTTGCGCGGAGTATACAT
SK10_14258643	10	TGATCACTAGCATAAGAAGGATTGA	GATCACTAGCATAAGAAGGATTGC	CGGTGGAGAAGTTTTCTGTTCCGTT
SK10_2335726	10	AAAAAAGCAATCAATTGGAGAAATGGAACT	AAAAAAGCAATCAATTGGAGAAATGGAACA	CTTCAATTCATGGACTAAGAATGGCTCAA
SK10_18835485	10	CGCAGAATGACCGAGCTCGGA	GCAGAATGACCGAGCTCGGC	AGACCCTTGAGAAGAWTATTGTAGGAGAA
SK10_17077378	10	GCAGATGACTGGCAACTTGCTCT	CAGATGACTGGCAACTTGCTCC	TAGGGATAATGAAGGTCAAACATTTGACAA
SK10_19020984	10	ACACCAGGAAATAATGTTAACATATTGAG	CACACCAGGAAATAATGTTAACATATTGAT	TGTGTTTTGCTTCATTTTTCCCATTTGGAT
SK10_19058375	10	GTAATTTTACAGTAGCCATTAATCAAAGTGT	AATTTTACAGTAGCCATTAATCAAAGTGC	GCAGCAAGGATTGAAACCTAATTGTGTTA
SK10_4664638	10	TTGATTCTGGGCAAACCTTTTACACT	TGATTCTGGGCAAACCTTTTACACA	CTTTCCAGATCCAAAACAAAAGTTGAACAA
SK10_6107128	10	CGTTTATAACCCAAATTTATGTTGGTACATTA	GTTTATAACCCAAATTTATGTTGGTACATTG	TTCATCCAAATGGAAAACACAAAGCATGTA
SK10_10203408	10	GACAGGCCAAACAGAGGAAGGTA	ACAGGCCAAACAGAGGAAGGTG	CTGCCCGTTACCTCCCTCCTA
SK10_12795360	10	CATCTCAGGAAAGTCTTTGGTTTCG	GCATCTCAGGAAAGTCTTTGGTTTCA	GAAGAAAGGTACAGTGTTAGCAGTGATT
SK10_15596312	10	GCCGACACCAACAGTATTGCACA	CCGACACCAACAGTATTGCACG	GCGGCAGCGTCTATGCTGCTTT
SK10_17948826	10	AATGAGATCCAGGTTGAGAGAGCAA	GAGATCCAGGTTGAGAGAGCAG	GCAGGTGCTTGTAAGTATTCTTTTCTGAA
SK10_20844181	10	GTCGGATGAACAAGAGGGGAGT	GTCGGATGAACAAGAGGGGAGA	CCAGTGCGACAACTGCATCATTGTA
SK10_3502733	10	ATTTGACAAGTCGAGCACTTCCAGT	GACAAGTCGAGCACTTCCAGC	CGCACAGCCTTGGTAATCTTCAGAA
SK10_7789664	10	GCGGCAGATCTCGGTGTGCAA	GCGGCAGATCTCGGTGTGCAT	GCCTCGCCTTGAACCCATTTACATT
SK11_20105143	11	ACGTGTGAATTGAAGTGATGGCA	ACGTGTGAATTGAAGTGATGGCG	CCTCAGTGAAATTTTTCATCCAGCACAA
SK11_25615839	11	CGCAGTGTTGCCATCTTGCGT	CGCAGTGTTGCCATCTTGCGG	CCCTTATTAAAAGTCAATGATGCGCAGAA
SK11_26300403	11	GTTTATTGAGATTTGTTGGTTCCCTGA	TATTGAGATTTGTTGGTTCCCTGG	TTTCAGGCCAAGAAACGACAGAAATGTT
SK11_2742952	11	GGCACATGTTACACGCGTACGTA	GCACATGTTACACGCGTACGTG	CGGCGTGTGCAAGGCTATGGTT
SK11_28767214	11	CCGTGTGCAAGAATCCATGTGCT	CCGTGTGCAAGAATCCATGTGCA	AGATTCGTGCGGTAGTTTCTGGGAA
SK11_13285229	11	GTTTACTTATGGTATCACGGCAATTC	AAATGTTTACTTATGGTATCACGGCAATTT	GGTGTTGAGCATAAGTCACATTAGAAGAA
SK11_19995657	11	CACTGCCCACCATTTTCCCCT	CACTGCCCACCATTTTCCCCA	ATCACTAGATAAGCACATGCGTTTCGATT
SK11_27597690	11	CATCTTCAGGAGCTCTCTGTCC	CCATCTTCAGGAGCTCTCTGTCA	GGACAATGCAAGCGAGTGTTAGGAT
SK11_3090889	11	GATTGCAGAGCCAGGACACTCT	GCAGAGCCAGGACACTCA	CAGTTGGTGTATTGCACTCGTCTGAT
SK11_7434978	11	AAAATTTTACATACCAAGGTTGATCAAATTTCA	TTACATACCAAGGTTGATCAAATTTCC	GGCTCCCAATTTTTCGGTTTGACGAT
SK11_2786989	11	CAGATGAATAGCCAAACAAATGCATCA	AGATGAATAGCCAAACAAATGCATCG	CACTTAAATGATTGCTAGCCGCATTGTTT
SK11_352865	11	GTGAATCATGATACTCAATCCGTCCA	GAATCATGATACTCAATCCGTCCC	GCAATATGGTGCAACGAATAGCATTTCAA
SK11_6475705	11	CTGCGGCCAGATTGCTG	AAGCTCTGCGGCCAGATTGCTA	GCGGTTGCGGCGCATAATTGGTT
SK11_27979265	11	CACTCTGGACGTGAGGAACACT	ACTCTGGACGTGAGGAACACG	TGCGGCGGGAGCTCACTGATT
SK11_20651397	11	TCCTTCATCGTCGGCCTTCCA	CCTTCATCGTCGGCCTTCCG	CAATGGAGTGCGTCAGCTTGGAAAT
SK11_20673987	11	CAGTATATCGAGTGATGCCTCCAA	AGTATATCGAGTGATGCCTCCAG	CAGATTTTGGGCTCTCGAAGTCTCTT
SK11_20750201	11	TCCGGATTGGCTCAGCAT	GCTTCCGGATTGGCTCAGCAC	GAGATATCCAAAACTGCCATCTTTGGAAA
SK11_20777287	11	CACCGGAAATACGGTTCATTGACAA	ACCGGAAATACGGTTCATTGACAG	TCGGAGCAATGAAATCATTGCAATCACTT
SK11_20835460	11	AGCTAATGGCCACTACTGGTAAAGT	CTAATGGCCACTACTGGTAAAGC	TTGGAGAGTCAAATTTGGAGATGCTCTTA
SK11_20859953	11	CTCAAATCTTTGGGCTTCGCG	AACTCTCAAATCTTTGGGCTTCGCA	CAGCGAGGAATTGCCGGGTGAT
SK11_20860748	11	AATGTGAAGCTCCTCCCAAATTCTATT	GTGAAGCTCCTCCCAAATTCTATC	CCAGTGTTAGCAAGTTGGAGAGCTT
SK11_20895902	11	ATAAATACAACAATTTGGTCATTTTCGGTTAAA	ATAAATACAACAATTTGGTCATTTTCGGTTAAT	GTCAGGCACTGCCATGAGTGGAA
SK11_23296409	11	CACACTGTTGTGTTACCAGGATCAT	ACACTGTTGTGTTACCAGGATCAG	GGATTGTGGAAGGTATAACCATAGATCAA
SK11_23361505	11	CGTGCTCTTCTCCCTTGCGTTTA	CGTGCTCTTCTCCCTTGCGTTTT	CATGACACCGTGGTCCTGGCTT
SK11_23560913	11	GAGGGAGTATTTGGAGTATTTTCTCG	GAGGGAGTATTTGGAGTATTTTCTCA	ACACGTACGGTGTGCTAAGTGCTTT
SK11_23607373	11	GGAGCAGCGTCCTGTTTGTG	AGGGAGCAGCGTCCTGTTTGTT	CTCGGGTACAAACCAATACGGGTAA
SK11_27822819	11	GGAAGTGCAAGCTAATACGAGTAC	CGGAAGTGCAAGCTAATACGAGTAT	GATCGTCAGCAAAATCATTACATTCTTGTA
SK11_27823925	11	CTTCTCTGTCTTAAGATGTTTTGCT	CTTCTCTGTCTTAAGATGTTTTGCC	AAAGGTTGATTTAGTGGAAAGCGAGGAA
SK11_27824960	11	TTGAGGTGTAAAATTGACCTGTTTGC	ATTTGAGGTGTAAAATTGACCTGTTTGT	CCAGCACCATTTTATTTTACAAACATGGTA
SK11_27995372	11	CAATCTATGGCATCTACCGTACA	CAATCTATGGCATCTACCGTACG	CCATGGTACAAGCATCGGTCCTTTA
SK11_27996731	11	TTGAATAAGTTGATCAACAAAAATGGCGA	TGAATAAGTTGATCAACAAAAATGGCGT	GTTAGACCCTAAAGACGCCATGTTGTA
SK11_28002867	11	CCTTTGGCCAAGTGGCCGTG	CCTTTGGCCAAGTGGCCGTA	CCTCGAAACAGACAGACTCTGATGTA
SK11_28006481	11	GGTATGTCAAGGAAGTCACTTCCAAT	GTATGTCAAGGAAGTCACTTCCAAC	CCTTCTTCTAGAGGAAGCTCGACTA
SK11_22664773	11	CTTTGGACTGATCACTTTCAGGCT	TGGACTGATCACTTTCAGGCG	GACTGGCCTCTGGTCACCACTA
SK11_25344585	11	AATCGTACTGACACCCTCAGAG	GTAATCGTACTGACACCCTCAGAT	GGGTGCATCTCTCACCACATTTTGAT
SK11_27982276	11	AGTGAATCTGCCACCAACTATAGTAT	GTGAATCTGCCACCAACTATAGTAC	GGTTGAAAATATGATGGAKAATGTGGTAAA
SK11_22248970	11	CCAGCCACCACCGCTACATAT	CCAGCCACCACCGCTACATAC	GTTAACACGCGCAGCCGCAGTA
SK11_24811740	11	GGAAGTGGAGCACGGAGGACA	GAAGTGGAGCACGGAGGACG	CAATGTGACCACCCACCTCGACTT
SK11_26305415	11	GACTTTGTTGATATTGCTTTGCCAGA	GACTTTGTTGATATTGCTTTGCCAGG	CAGCCTTTGCTTCAGATGGAACACTT
SK11_28845529	11	CGGGTCACGGCTCTCATCAC	ACGGGTCACGGCTCTCATCAA	TATATTAGGAGGAACGGAGTACTAGCTTT
SK11_4430937	11	CCATCCACATGCCATAGTCGTAT	CCATCCACATGCCATAGTCGTAC	GATGAGGAGGACGTGTCGAGGTA
SK11_11984108	11	GGGAATCTTAGATCACCACTGCC	GGGAATCTTAGATCACCACTGCT	GTTGAGCACCAAGGAAATGCGACAA
SK11_1642603	11	ATCTCCCTCCCACCATACAGATT	ATCTCCCTCCCACCATACAGATA	GAGAACACAAATATTTAAAGTCTCATGAAT
SK11_9378234	11	GTGCACGGTACTATGCGAGCTT	GCACGGTACTATGCGAGCTC	CCGATCCTCCCACCAAATTTGGTAA
SK12_1305969	12	AAAAGCTCTCATAGTGACTGGGTATTA	AAGCTCTCATAGTGACTGGGTATTG	CGGATTGAGAACCAGGTATCTCGTA
SK12_21616307	12	GTTGTGACATCTGCAGTCCATTTCT	GTGACATCTGCAGTCCATTTCG	CTGTGGCCACTATTTTGCTTTGTAGTTTA
SK12_25332488	12	TTGATGAATCTTGATGTACTGATACGTAA	GATGAATCTTGATGTACTGATACGTAG	CCACAAGTTAAACCATACCAAATCAACGAT
SK12_3651626	12	GCAAGAAACAGGGCACATTTGTTCAA	GCAAGAAACAGGGCACATTTGTTCAT	GCCTCAAATTATTGAGGAACTTAGAGCTA
SK12_726535	12	TCGAAATGCATTACAGGTAGATTTGTAAA	CGAAATGCATTACAGGTAGATTTGTAAG	AGTTCCAATTATGTGTACGGTGCACAAAT
SK12_12388405	12	TACCACCTGTTGCTAGAAGCCA	ACCACCTGTTGCTAGAAGCCG	ATCAGCAGTAGGGCCGAAAATCCAA
SK12_20536782	12	CCTACCCGATGAGTCTGGCTAT	CTACCCGATGAGTCTGGCTAG	GTAAAGCCTAGACCAAAGGTGCCTA
SK12_24088209	12	GGAGACCACCATCAATTCGTTCATT	GAGACCACCATCAATTCGTTCATC	TTATACCCTCCACCGGGCGGTA
SK12_3209508	12	TTAGAGATTTGTAAAGCGATATGCACT	AGAGATTTGTAAAGCGATATGCACC	GATCGATGGCATATCGCTCCAGATT
SK12_23428013	12	CGTATGATTAGTACCTACTTGCAATAAAA	CGTATGATTAGTACCTACTTGCAATAAAT	GAAGATCACGAAGGACAATGAGATATCAT
SK12_10607554	12	GCCGTGGCTTCTATCTTTACCTT	GCCGTGGCTTCTATCTTTACCTG	ATTGGTTTCAAACAATCATCAAGTCAGGTT
SK12_22657878	12	CAGGCATGTACATAACCACACGAA	AGGCATGTACATAACCACACGAG	AGTGAAGAGTTCAACTCAGAAACACCAT
SK12_22731762	12	ATATCAAGAGAAAGAAATGCCTGCAG	ATATCAAGAGAAAGAAATGCCTGCAC	GGTTTTCCAGGTAGCTTCATACACATATA
SK12_22770407	12	GCAGCCTTGTCTGCTGTGAAATT	GCAGCCTTGTCTGCTGTGAAATA	TCTGCTCTTGCGTTTTTAGATGCCATTTT
SK12_23201780	12	GTCTTATTACGCGTGGCCATTGA	GTCTTATTACGCGTGGCCATTGT	CGACAACAGATGACTCCGGCAATTT
SK12_23241905	12	TCATTGGTTGGCTACTACGATTTCAA	CATTGGTTGGCTACTACGATTTCAG	GATTATAGATGATGTTCAATGTCCTTTCAT
SK12_23265437	12	CCATCAACAAAGAAGCACATACACC	GCCATCAACAAAGAAGCACATACACA	GGTCTCAGACACAATTATTCATGCGATTT
SK12_23271214	12	ACCATCAGAAAAATCCTGTGAGGAG	ACCATCAGAAAAATCCTGTGAGGAC	GACCTTTCAACTATTTCCTTGTCACGAAT
SK12_23290179	12	AAACCTCCGTCACTGAGCATACTT	ACCTCCGTCACTGAGCATACTG	CCCTTTCATGCTATGACACGCTTCAA
SK12_10611754	12	ATGATGACACCCTGCGATGCAC	CATGATGACACCCTGCGATGCAA	GAGCTGCAGAGGTCTCCATCCAT
SK12_17303332	12	ACGATCAGTCGTCGTCAATCTCTA	ACGATCAGTCGTCGTCAATCTCTT	AAACCAAGACACGAAGTAAAGATGAGCTA
SK12_27022568	12	TTGTGAAGGGCCAGTTTGTTGAG	GTTTGTGAAGGGCCAGTTTGTTGAA	GTTCACGTGTAAAAGAAATTCACCTGGAA
SK12_3581427	12	CGTCGGTTAGCATCCAGCACAT	GTCGGTTAGCATCCAGCACAC	GATGAAGGTGAGGTTGTCCAGCAT
SK12_9581909	12	ATACACTATCTGTCGCATTCCACAC	ATACACTATCTGTCGCATTCCACAA	GAGTTGAAGAGATCAACGTTATCTGAGAT
SK12_13611592	12	TCTGCAGTTCTGCTGACATAATCC	CTTCTGCAGTTCTGCTGACATAATCT	CATGAATGCAAACATTTACAGTACAGGAAA
SK12_14854155	12	CGAATTTGCTTAAGTTTTAGGTTTTGTTCA	GAATTTGCTTAAGTTTTAGGTTTTGTTCG	GAAAGTCGGCTGTCTTAAAATTTCAGCAA
SK12_16054329	12	GTCGTTAAGAGCATGCCCATTAGA	CGTTAAGAGCATGCCCATTAGG	ACATCCAGAGCAAAGATGATGATTGCTA
SK12_19410312	12	AAGCGGAGCACAAGCACTGCA	AAGCGGAGCACAAGCACTGCT	CCTTGGGCACACACCGAACCAT
SK12_2236665	12	GATAAATCTGTCCAATTTTCTGGAG	CTGATAAATCTGTCCAATTTTCTGGAT	GCATTGCACTTGTATAAATCTTAGAGACTT
SK12_26166623	12	GGACACCTTAGAAAACTGATAATTTGCT	GACACCTTAGAAAACTGATAATTTGCC	GTCTTCAATCGGACCGAAAATGCCAT
SK12_6602483	12	CAATCTACTGTGCATACGTGTTACAAAAT	CAATCTACTGTGCATACGTGTTACAAAAA	GGCTCTAAACAACAGCTAGCCTGAT
